# Supplementary material for: Treatment Rates for Mental Disorders Among Children and Adolescents: A Systematic Review and Meta-Analysis
Source: PubMed Central journal article supplement (PMC10585417; doi:10.1001/jamanetworkopen.2023.38174), 2023-10-18
Supplement: jamanetwopen-e2338174-s001.pdf [file jamanetwopen-e2338174-s001.pdf]

## Supplementary Online Content

Wang S, Li Q, Lu J, et al. Treatment rates for mental disorders among children and adolescents: a systematic review and meta-analysis. *JAMA Netw Open*. 2023;6(10):e2338174. doi:10.1001/jamanetworkopen.2023.38174

**eTable.** JBI Quality Scores of Included Studies (N=40)

**eFigure 1.** Treatment Rates for Any Mental Disorder by Year of Data Collection

**eFigure 2.** Treatment Rates for Depressive Disorders by Year of Data Collection

**eFigure 3.** Treatment Rates for Anxiety Disorders by Year of Data Collection

**eFigure 4.** Treatment Rates for ADHD by Year of Data Collection

**eFigure 5.** Treatment Rates for Behavior Disorders by Year of Data Collection

**eFigure 6.** Treatment Rates for Any Mental Disorder by Regions

**eFigure 7.** Treatment Rates for Depressive Disorders by Regions

**eFigure 8.** Treatment Rates for Anxiety Disorders by Regions

**eFigure 9.** Treatment Rates for ADHD by Regions

**eFigure 10.** Treatment Rates for Behavior Disorders by Regions

**eFigure 11.** Treatment Rates for Any Mental Disorder by Age Groups

**eFigure 12.** Treatment Rates for Depressive Disorders by Age Groups

**eFigure 13.** Treatment Rates for Anxiety Disorders by Age Groups

**eFigure 14.** Treatment Rates for ADHD by Age Groups

**eFigure 15.** Treatment Rates for Behavior Disorders by Age Groups

**eFigure 16.** Treatment Rates for Any Mental Disorder by Income Groups

**eFigure 17.** Treatment Rates for Depressive Disorders by Income Groups

**eFigure 18.** Treatment Rates for Anxiety Disorders by Income Groups

**eFigure 19.** Subgroup by Timeframe

**eFigure 20.** Treatment Rates for Any Mental Disorder by Timeframes

**eFigure 21.** Treatment Rates for Depressive Disorders by Timeframes

**eFigure 22.** Treatment Rates for Anxiety Disorders by Timeframes

**eFigure 23.** Treatment Rates for ADHD by Timeframes

**eFigure 24.** Treatment Rates for Behavior Disorders by Timeframes

**eFigure 25.** Subgroup by Informant Source

**eFigure 26.** Treatment Rates for Any Mental Disorder by Informant Sources

**eFigure 27.** Treatment Rates for Depressive Disorders by Informant Sources

**eFigure 28.** Treatment Rates for Anxiety Disorders by Informant Sources

**eFigure 29.** Treatment Rates for ADHD by Informant Sources

**eFigure 30.** Treatment Rates for Behavior Disorders by Informant Sources

**eFigure 31.** Subgroup by Health Service Type

**eFigure 32.** Treatment Rates for Any Mental Disorder by Health Service Types

**eFigure 33.** Treatment Rates for Depressive Disorders by Health Service Types

**eFigure 34.** Treatment Rates for Anxiety Disorders by Health Service Types

**eFigure 35.** Treatment Rates for ADHD by Health Service Types

**eFigure 36.** Treatment Rates for Behavior Disorders by Health Service Types

**eFigure 37.** Subgroup by Sample Origin Population

**eFigure 38.** Treatment Rates for Any Mental Disorder by the Sample Origin Population  
**eFigure 39.** Treatment Rates for Depressive Disorders by the Sample Origin Population  
**eFigure 40.** Treatment Rates for Anxiety Disorders by the Sample Origin Population  
**eFigure 41.** Treatment Rates for ADHD by the Sample Origin Population  
**eFigure 42.** Treatment Rates for Behavior Disorders by the Sample Origin Population  
**eFigure 43.** Treatment Rates for Internalizing and Externalizing Disorders  
**eFigure 44.** Sensitivity Analysis Forest Plots for Any Mental Disorder  
**eFigure 45.** Sensitivity Analysis Forest Plots for Depressive Disorders  
**eFigure 46.** Sensitivity Analysis Forest Plots for Anxiety Disorders  
**eFigure 47.** Sensitivity Analysis Forest Plots for ADHD  
**eFigure 48.** Sensitivity Analysis Forest Plots for Behavior Disorders  
**eFigure 49.** Sensitivity Analysis by Excluding Studies in Which the 95% CI Was Outside the Aggregated 95% CI of All Studies  
**eFigure 50.** Sensitivity Analysis by Excluding Studies Not Reported Age Ranges  
**eFigure 51.** Funnel Plot (Left) and Trim-and-Fill Funnel Plot (Right)  
**eFigure 52.** Treatment Rates for ADHD  
**eFigure 53.** Treatment Rates for Behavior Disorders  
**eFigure 54.** Subgroup Analysis by Age Group  
**eFigure 55.** Subgroup Analysis by Income Level  
**eMethods 1.** Retrieval Strategy  
**eMethods 2.** Exposure  
**eResults.** Study Selection  
**eAppendix.** Explicit Search Entry  
**eReferences.**

This supplementary material has been provided by the authors to give readers additional information about their work.

**eTable. JBI Quality Scores of Included Studies (N=40)**

| Study                     | Item 1 | Item 2  | Item 3 | Item 4 | Item 5  | Item 6 | Item 7  | Item 8 | Item 9  | Total |
|---------------------------|--------|---------|--------|--------|---------|--------|---------|--------|---------|-------|
| Angold et al, 2002        | Yes    | Yes     | Yes    | Yes    | Yes     | Yes    | No      | Yes    | No      | 7     |
| Bird et al, 2008          | Yes    | Yes     | Yes    | No     | Unclear | Yes    | No      | Yes    | Unclear | 5     |
| Borges et al, 2008        | Yes    | Yes     | Yes    | No     | No      | Yes    | Unclear | Yes    | No      | 5     |
| Buckner et al, 1997       | No     | Unclear | No     | Yes    | Yes     | Yes    | Yes     | Yes    | Yes     | 6     |
| Bussing et al, 2003       | Yes    | Yes     | Yes    | Yes    | Yes     | Yes    | No      | Yes    | No      | 7     |
| Bussing et al, 2011       | Yes    | Yes     | Yes    | Yes    | Yes     | Yes    | No      | Yes    | No      | 7     |
| Canino et al, 2004        | Yes    | Yes     | Yes    | No     | Yes     | Yes    | No      | Yes    | Yes     | 7     |
| Chavira et al, 2004       | No     | Yes     | No     | Yes    | Yes     | Yes    | Yes     | Yes    | No      | 6     |
| Coker et al, 2009         | Yes    | Yes     | Yes    | Yes    | Yes     | Yes    | No      | Yes    | No      | 7     |
| Cuffe et al, 2001         | Yes    | Unclear | Yes    | Yes    | Yes     | Yes    | Yes     | Yes    | Yes     | 8     |
| Cummings et al, 2011      | Yes    | Unclear | Yes    | No     | Yes     | Yes    | No      | Yes    | Unclear | 5     |
| Daeem et al, 2019         | No     | No      | Yes    | Yes    | Yes     | Yes    | Yes     | Yes    | Yes     | 7     |
| Essau et al, 2005         | No     | Yes     | Yes    | Yes    | Unclear | Yes    | No      | Yes    | No      | 5     |
| Fatori et al, 2019        | Yes    | Unclear | Yes    | Yes    | No      | Yes    | Yes     | Yes    | Unclear | 6     |
| Flament et al, 2001       | Yes    | Yes     | No     | No     | Yes     | Yes    | Yes     | Yes    | Yes     | 7     |
| Georgiades et al, 2019    | Yes    | Yes     | Yes    | Yes    | No      | Yes    | Yes     | Yes    | No      | 7     |
| Gómez-Beneyto et al, 1994 | Yes    | Yes     | Yes    | No     | Yes     | Yes    | Yes     | Yes    | Yes     | 8     |
| Gould et al, 2009         | Yes    | Unclear | Yes    | Yes    | Yes     | Yes    | Yes     | Yes    | No      | 7     |
| Heiervang et al, 2007     | Yes    | Unclear | Yes    | No     | No      | Yes    | Yes     | Yes    | No      | 5     |
| Leaf et al, 1996          | Yes    | No      | Yes    | Yes    | Unclear | Yes    | Yes     | Yes    | Unclear | 6     |
| Lewinsohn et al, 1998     | Yes    | Yes     | Yes    | No     | Yes     | Yes    | No      | Yes    | No      | 6     |
| Locke et al, 2017         | No     | No      | Yes    | Yes    | Yes     | Yes    | No      | Yes    | No      | 5     |
| Maalouf et al, 2016       | Yes    | Yes     | Yes    | Yes    | No      | Yes    | Yes     | Yes    | No      | 7     |
| Magklara et al, 2015      | Yes    | Yes     | Yes    | Yes    | Yes     | Yes    | Yes     | Yes    | Yes     | 9     |
| Meredith et al, 2009      | No     | No      | Yes    | Yes    | Yes     | Yes    | No      | Yes    | Yes     | 6     |
| Merikangas et al, 2010    | Yes    | Yes     | Yes    | No     | No      | Yes    | No      | Yes    | No      | 5     |
| Merikangas et al, 2011    | Yes    | No      | Yes    | Yes    | Yes     | Yes    | Yes     | Yes    | Yes     | 8     |
| Niermann et al, 2021      | Yes    | Yes     | Yes    | Yes    | No      | Yes    | Yes     | Yes    | No      | 7     |
| Reardon et al, 2020       | Yes    | Yes     | Yes    | Yes    | No      | Yes    | No      | Yes    | Unclear | 6     |
| Sawyer et al, 2004        | Yes    | Yes     | Yes    | Yes    | No      | Yes    | No      | Yes    | No      | 6     |
| Sawyer et al, 2018        | Yes    | Unclear | Yes    | Yes    | No      | Yes    | No      | Yes    | No      | 5     |
| Stiffman et al, 1988      | Yes    | Unclear | Yes    | Yes    | Yes     | Yes    | No      | Yes    | Yes     | 7     |
| Tanielian et al, 2009     | No     | No      | Yes    | Yes    | Yes     | Yes    | No      | Yes    | Unclear | 5     |
| Vicente et al, 2012       | Yes    | Yes     | Yes    | No     | Yes     | Yes    | Yes     | Yes    | Yes     | 8     |
| Wagner et al, 2017        | Yes    | No      | Yes    | Yes    | Yes     | Yes    | No      | Yes    | No      | 6     |
| Wu et al, 1999            | Yes    | Yes     | Yes    | Yes    | Unclear | Yes    | No      | Yes    | Unclear | 6     |
| Wu et al, 2001            | Yes    | Unclear | Yes    | Yes    | Unclear | Yes    | Yes     | Yes    | Unclear | 6     |
| Zhang et al, 2021         | Yes    | Yes     | Yes    | Yes    | Yes     | Yes    | No      | Yes    | Unclear | 7     |
| Zhong et al, 2013         | Yes    | Yes     | Yes    | Yes    | Yes     | Yes    | Yes     | Yes    | No      | 8     |
| Zwaanswijk et al, 2005    | No     | Yes     | Yes    | Yes    | Yes     | Yes    | No      | Yes    | No      | 6     |

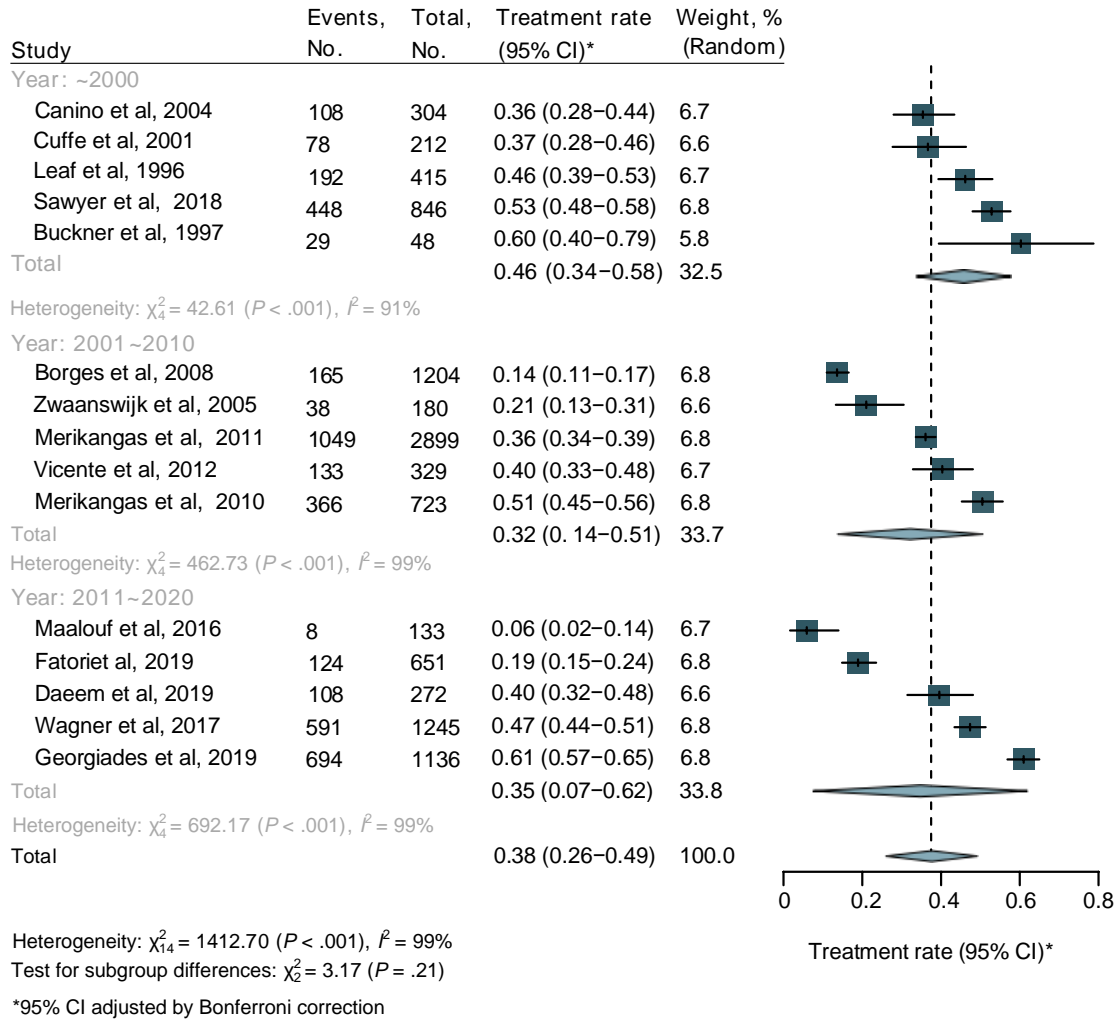

**eFigure 1. Treatment rates for any mental disorder by year of data collection**

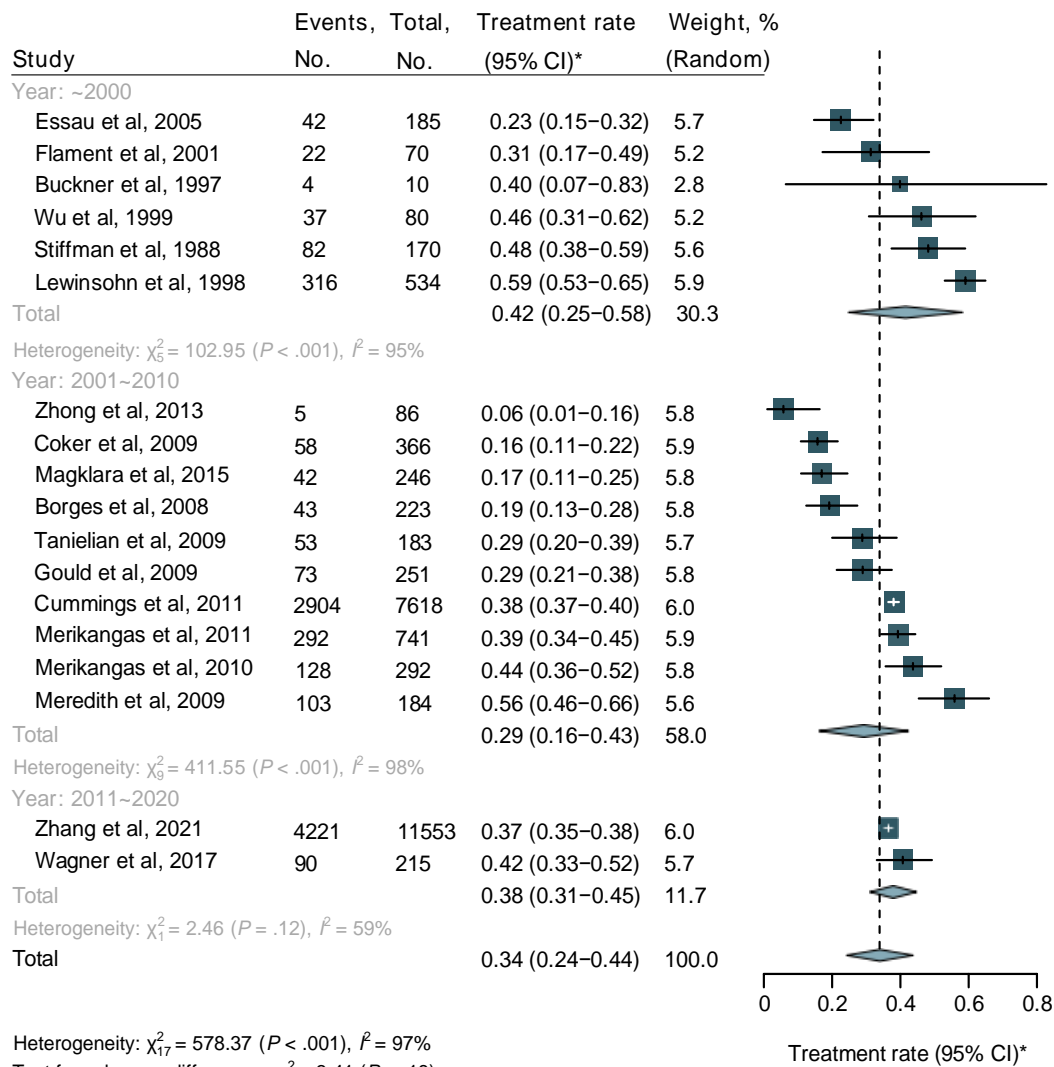

Heterogeneity:  $\chi^2_{17} = 578.37$  ( $P < .001$ ),  $I^2 = 97\%$   
 Test for subgroup differences:  $\chi^2_2 = 3.41$  ( $P = .18$ )

\*95% CI adjusted by Bonferroni correction

**eFigure 2. Treatment rates for depressive disorders by year of data collection**

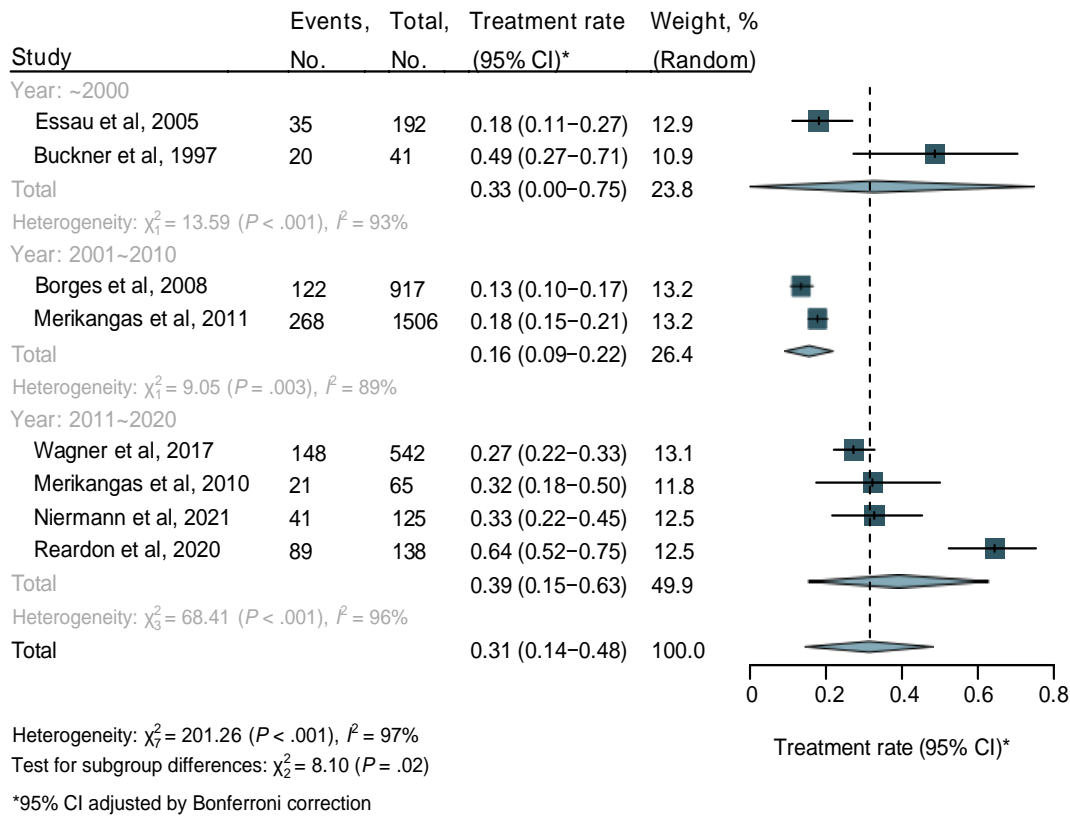

**eFigure 3. Treatment rates for anxiety disorders by year of data collection**

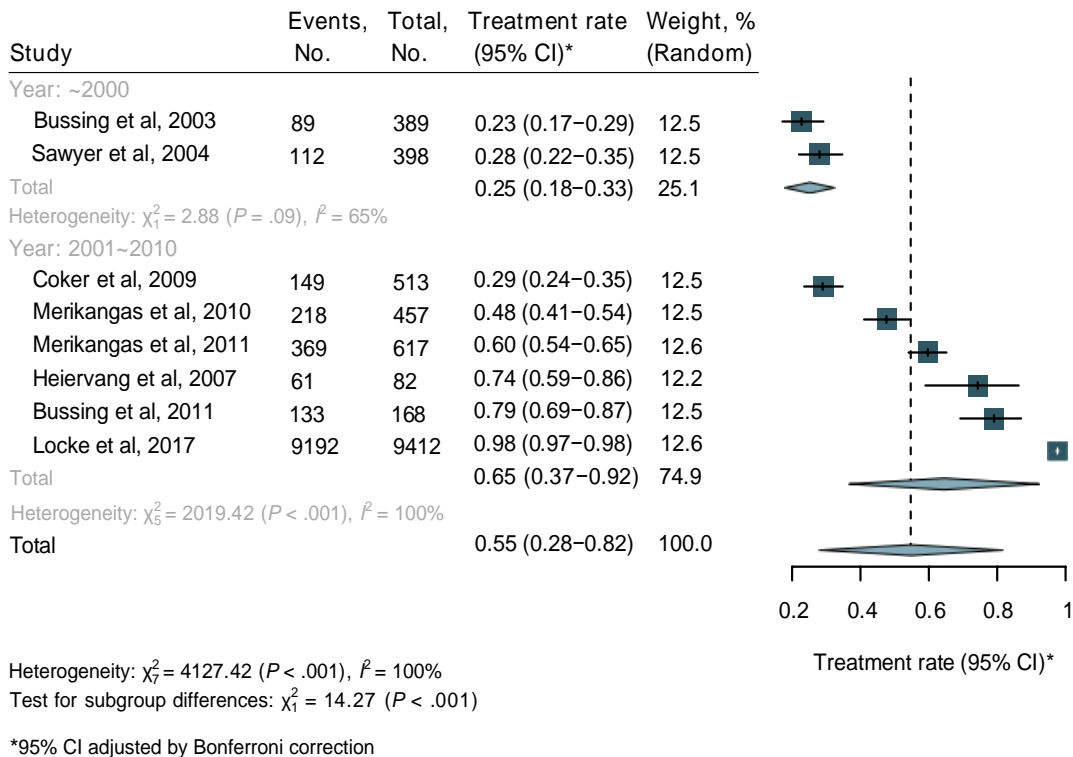

**eFigure 4. Treatment rates for ADHD by year of data collection**

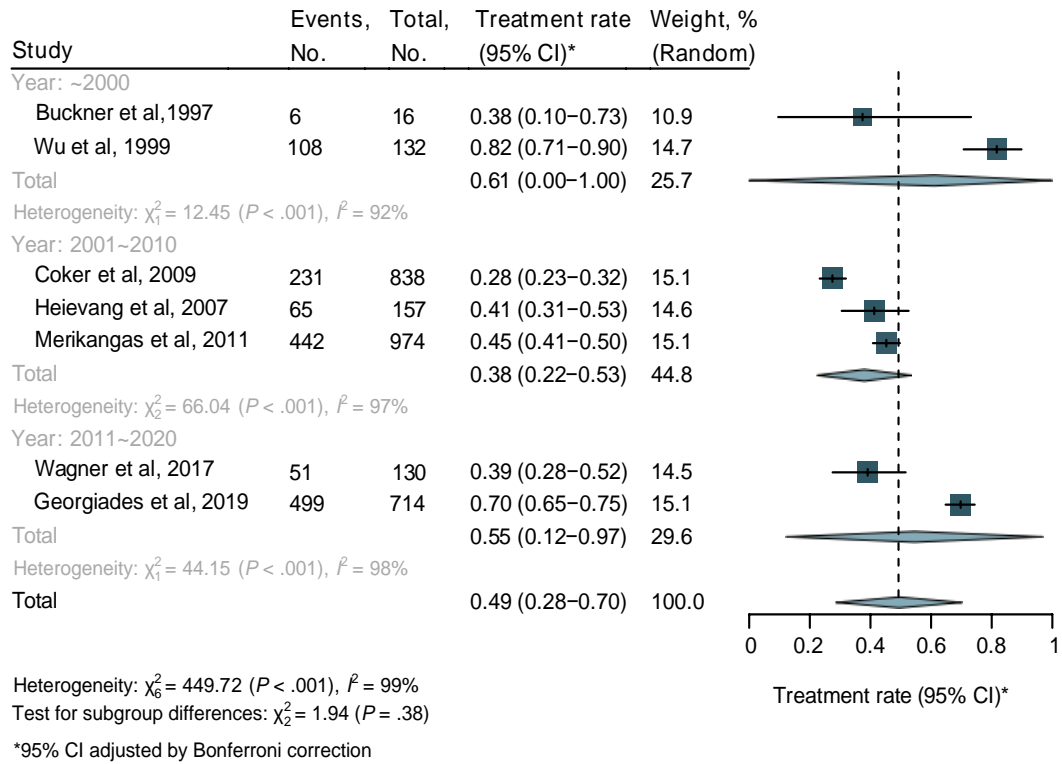

**eFigure 5. Treatment rates for behavior disorders by year of data collection**

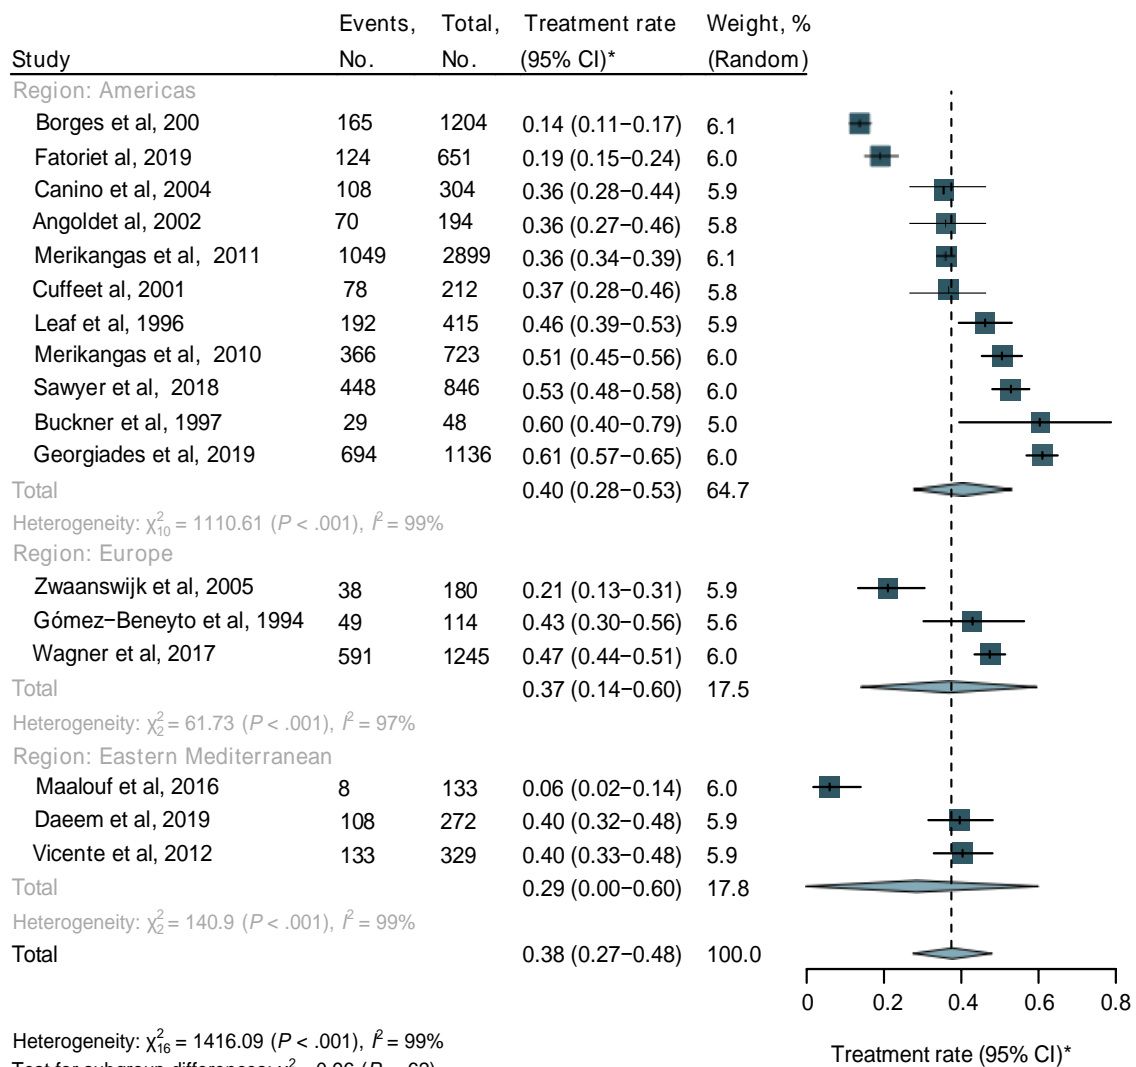

Heterogeneity:  $\chi^2_{16} = 1416.09$  ( $P < .001$ ),  $I^2 = 99\%$   
 Test for subgroup differences:  $\chi^2_2 = 0.96$  ( $P = .62$ )

\*95% CI adjusted by Bonferroni correction

**eFigure 6. Treatment rates for any mental disorder by regions**



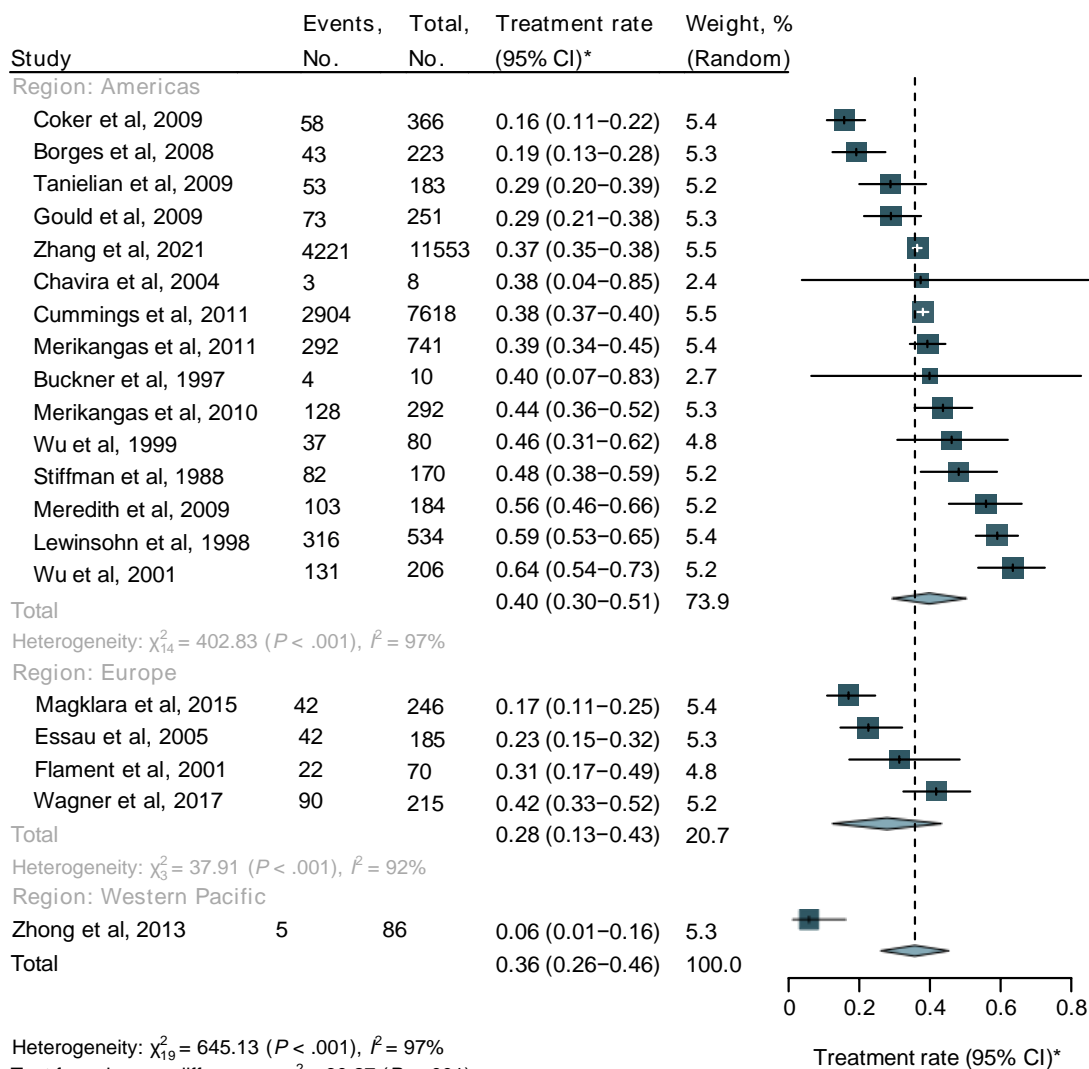

Heterogeneity:  $\chi^2_{19} = 645.13$  ( $P < .001$ ),  $I^2 = 97\%$   
 Test for subgroup differences:  $\chi^2_2 = 60.27$  ( $P < .001$ )

\*95% CI adjusted by Bonferroni correction

**eFigure 7. Treatment rates for depressive disorders by regions**

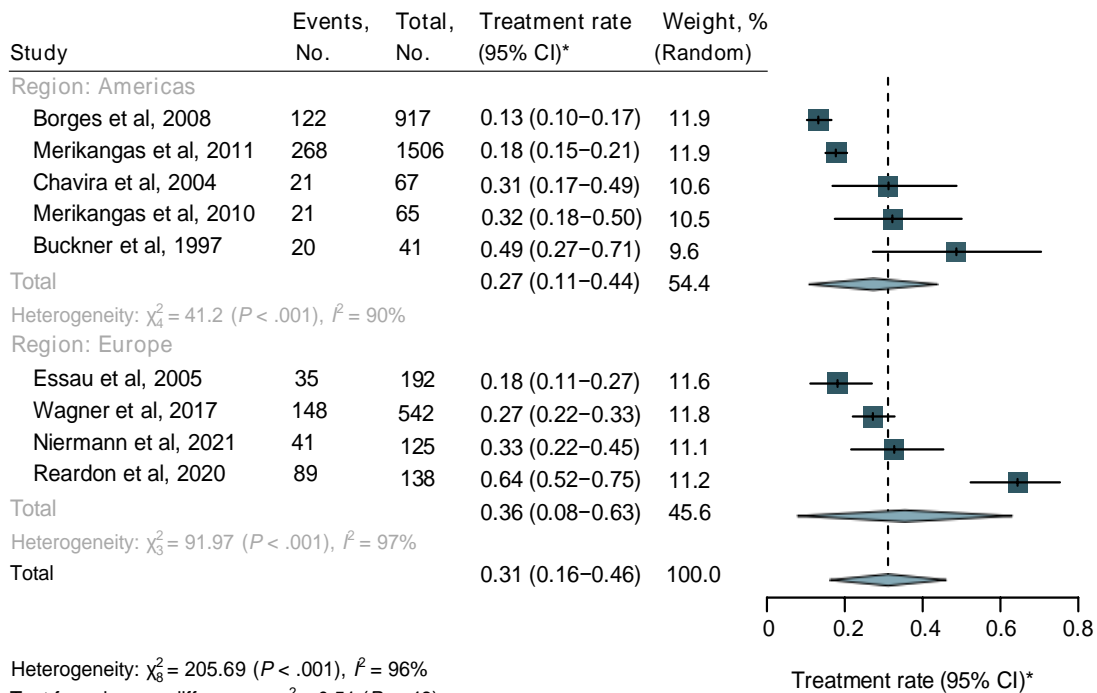

Heterogeneity:  $\chi^2_8 = 205.69$  ( $P < .001$ ),  $I^2 = 96\%$   
 Test for subgroup differences:  $\chi^2_1 = 0.51$  ( $P = .48$ )

\*95% CI adjusted by Bonferroni correction

**eFigure 8. Treatment rates for anxiety disorders by regions**

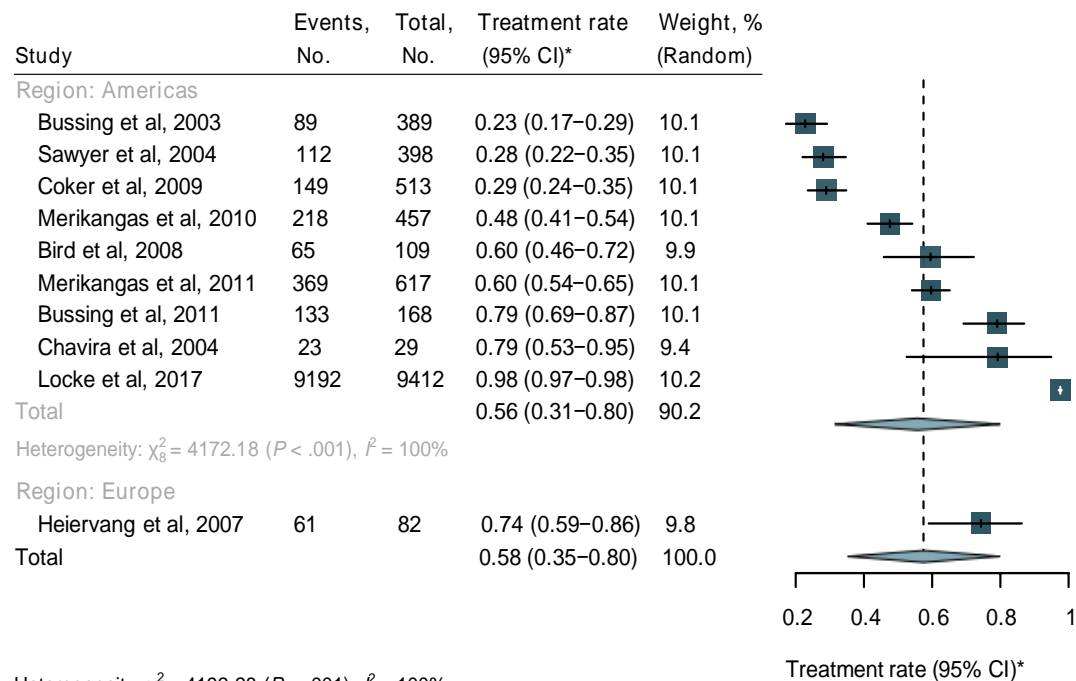

Heterogeneity:  $\chi^2_9 = 4192.28$  ( $P < .001$ ),  $I^2 = 100\%$   
 Test for subgroup differences:  $\chi^2_1 = 3.46$  ( $P = .06$ )

\*95% CI adjusted by Bonferroni correction

**eFigure 9. Treatment rates for ADHD by regions**

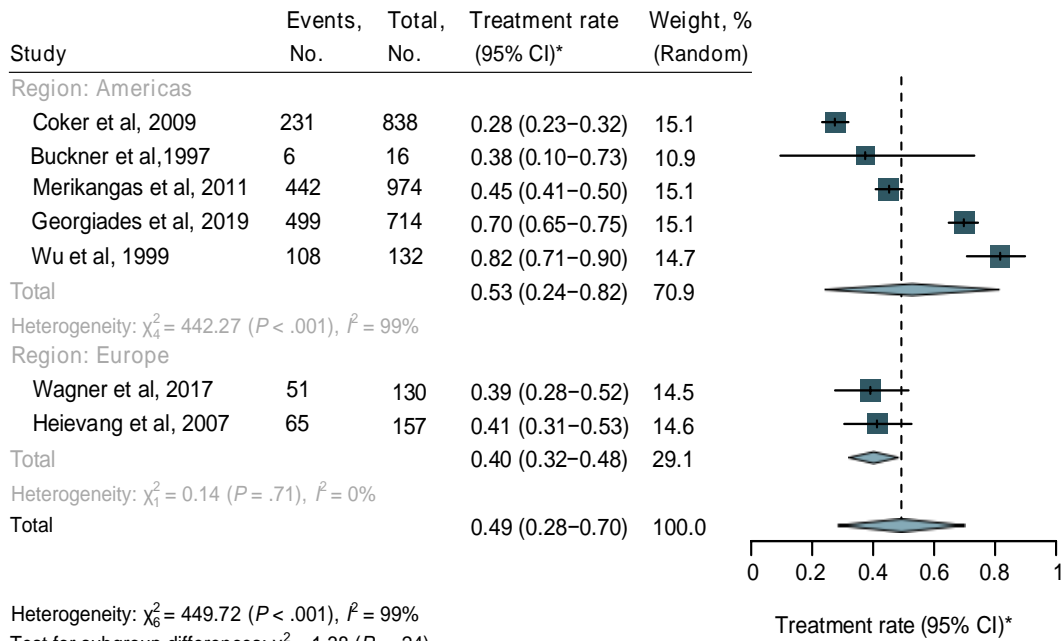

**eFigure 10. Treatment rates for behavior disorders by regions**

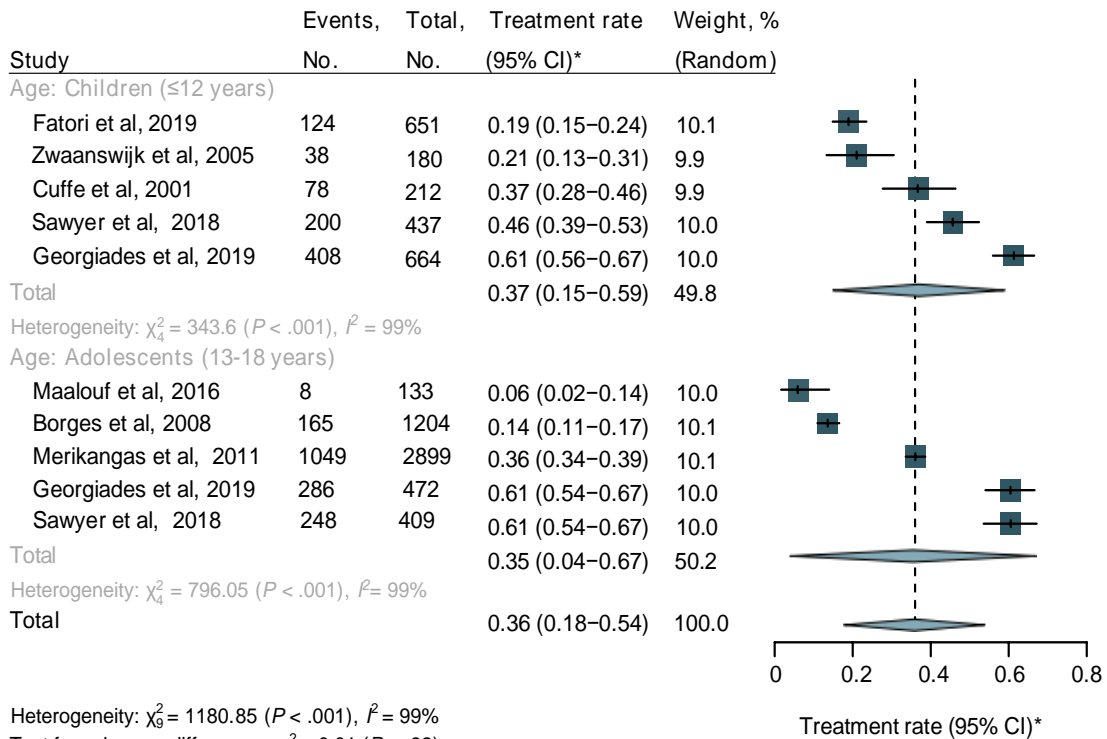

**eFigure 11. Treatment rates for any mental disorder by age groups**

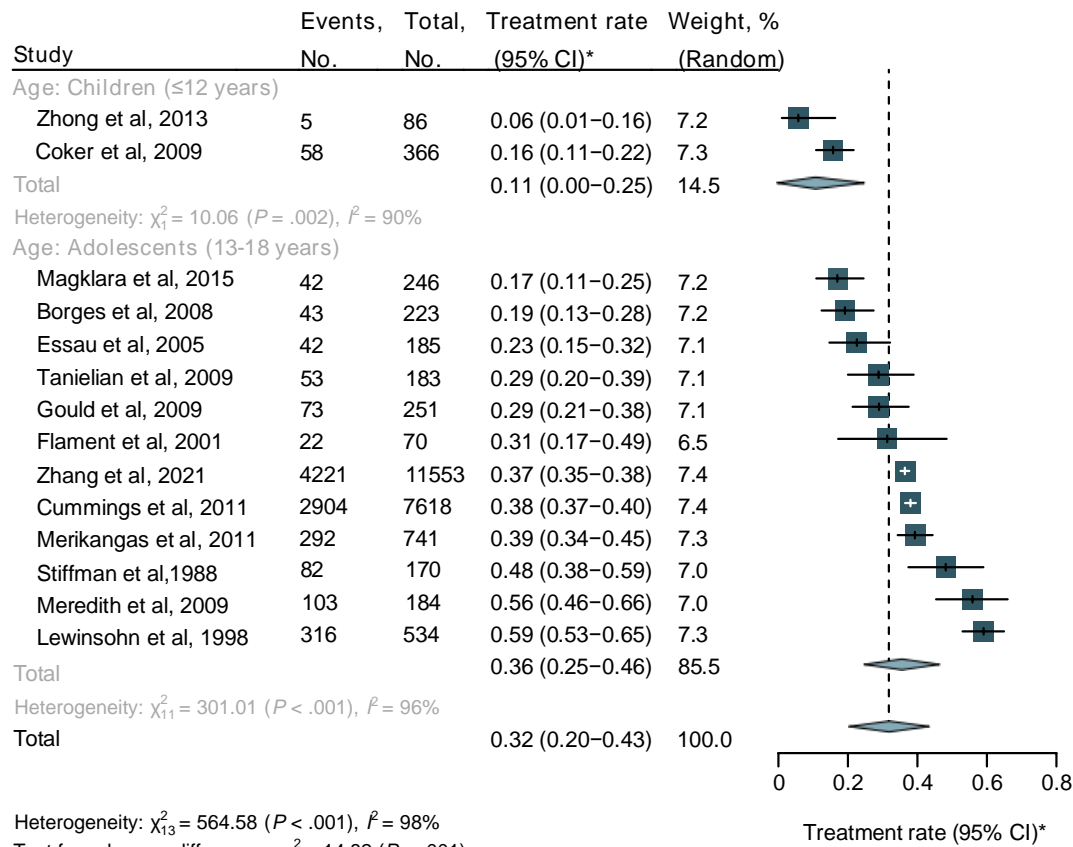

**eFigure 12. Treatment rates for depressive disorders by age groups**

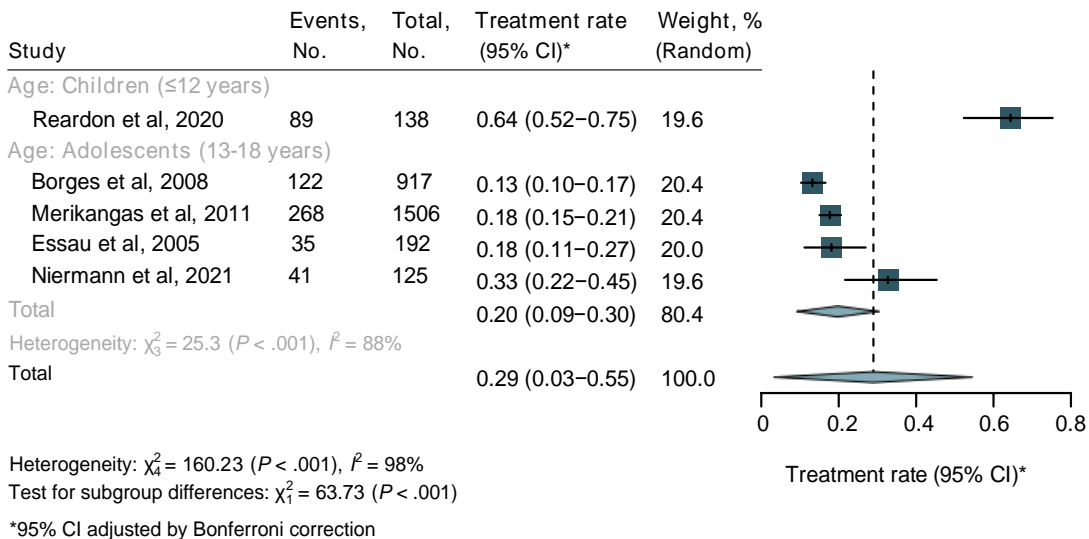

**eFigure 13. Treatment rates for anxiety disorders by age groups**

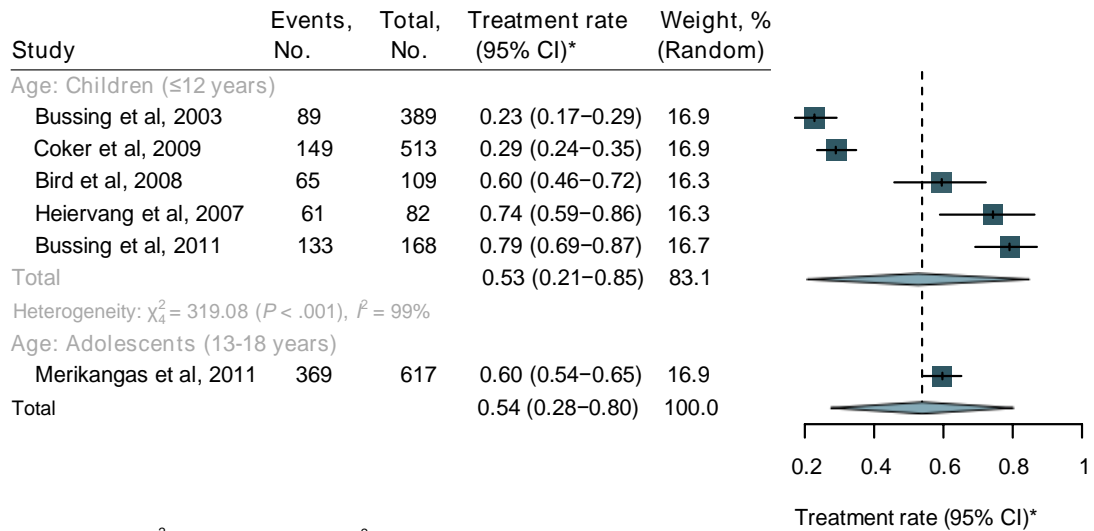

Heterogeneity:  $\chi^2_5 = 393.15$  ( $P < .001$ ),  $I^2 = 99\%$   
 Test for subgroup differences:  $\chi^2_1 = 0.35$  ( $P = .55$ )  
 \*95% CI adjusted by Bonferroni correction

**eFigure 14. Treatment rates for ADHD by age groups**

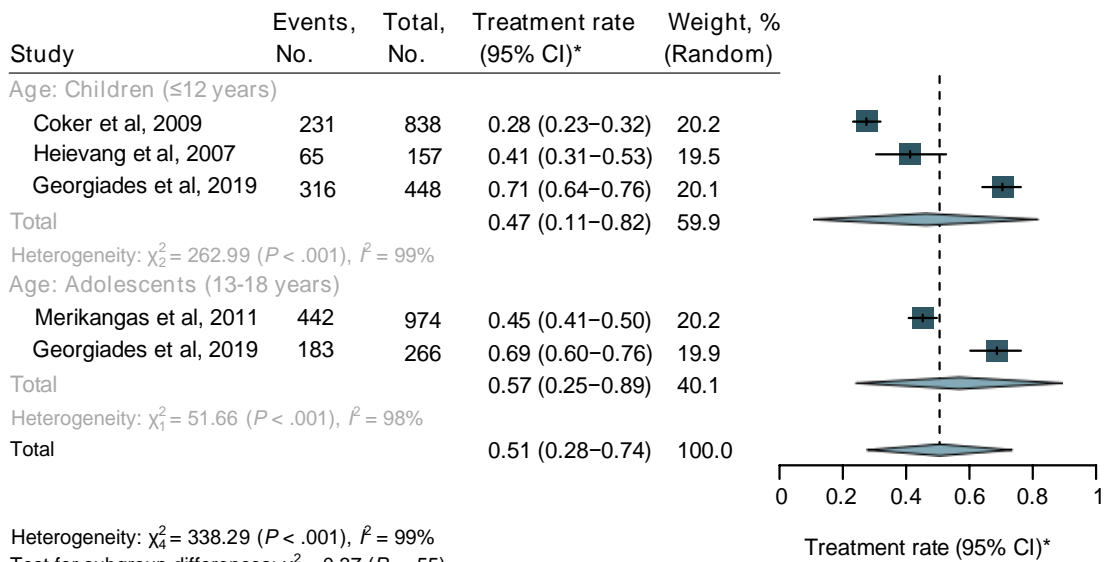

Heterogeneity:  $\chi^2_4 = 338.29$  ( $P < .001$ ),  $I^2 = 99\%$   
 Test for subgroup differences:  $\chi^2_1 = 0.37$  ( $P = .55$ )  
 \*95% CI adjusted by Bonferroni correction

**eFigure 15. Treatment rates for behavior disorders by age groups**

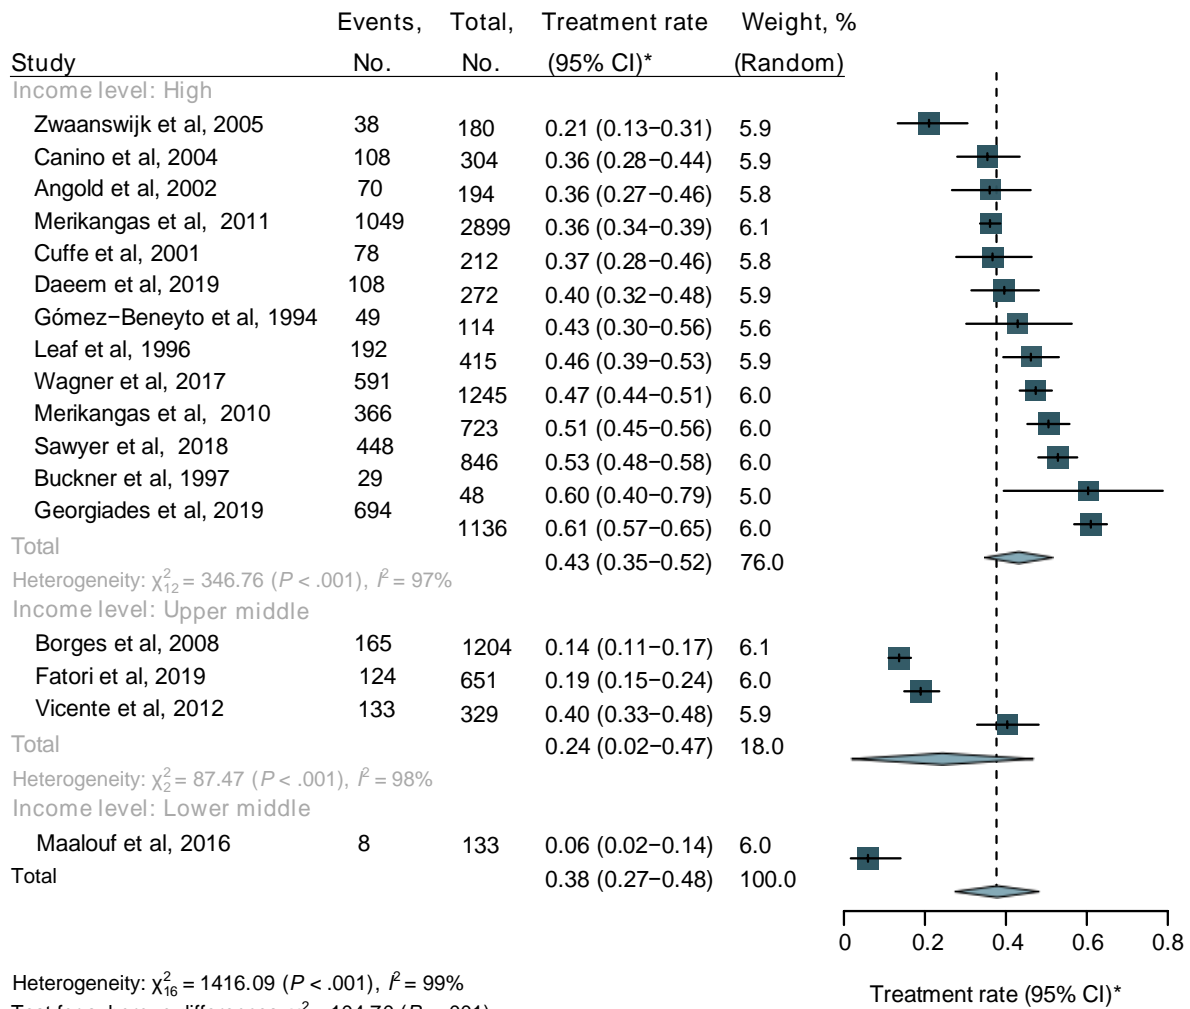

Heterogeneity:  $\chi^2_{16} = 1416.09$  ( $P < .001$ ),  $I^2 = 99\%$   
 Test for subgroup differences:  $\chi^2_2 = 104.70$  ( $P < .001$ )  
 \*95% CI adjusted by Bonferroni correction

**eFigure 16. Treatment rates for any mental disorder by income groups**

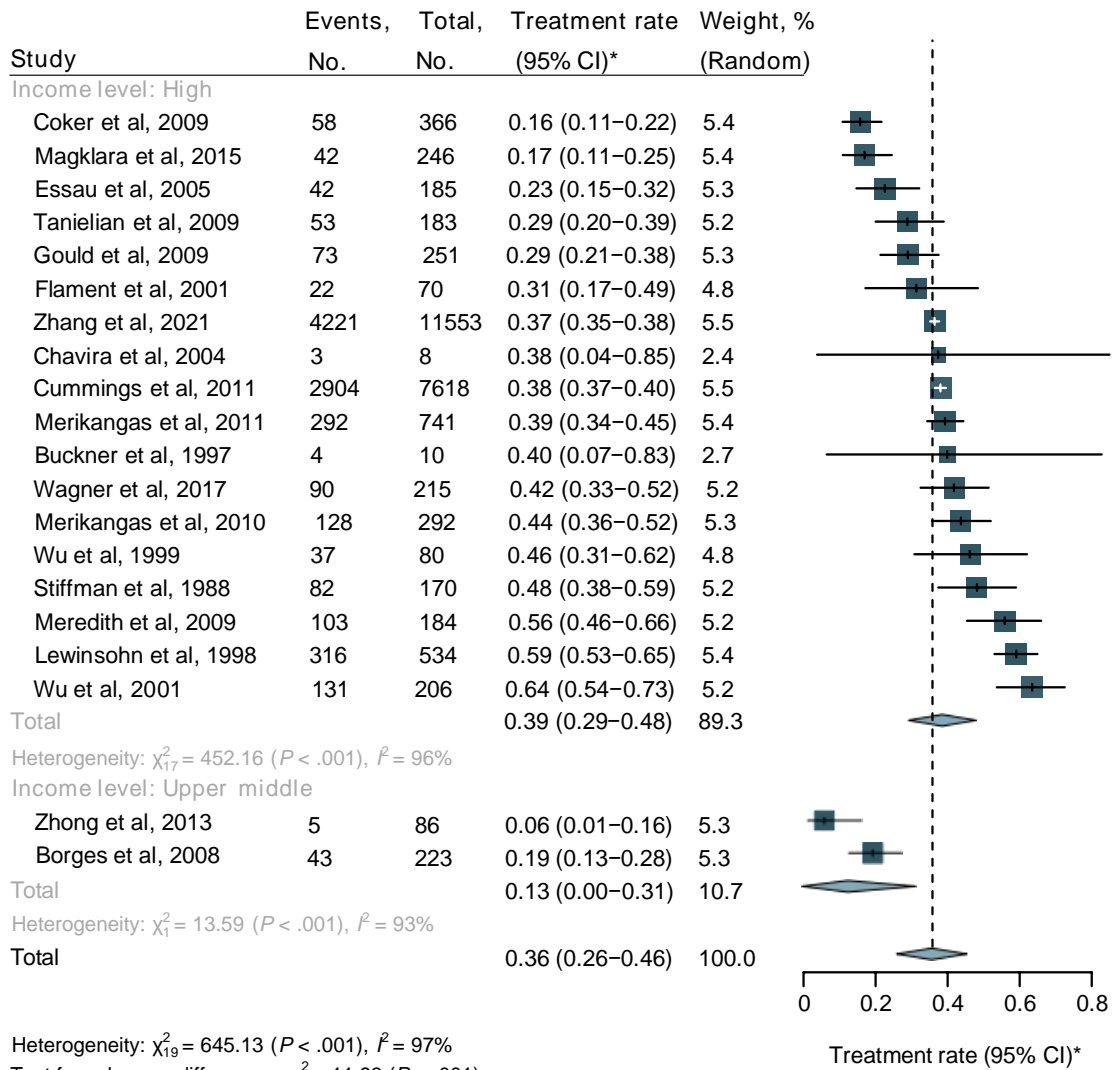

Heterogeneity:  $\chi^2_{19} = 645.13$  ( $P < .001$ ),  $I^2 = 97\%$   
 Test for subgroup differences:  $\chi^2_1 = 11.93$  ( $P < .001$ )  
 \*95% CI adjusted by Bonferroni correction

**eFigure 17. Treatment rates for depressive disorders by income groups**

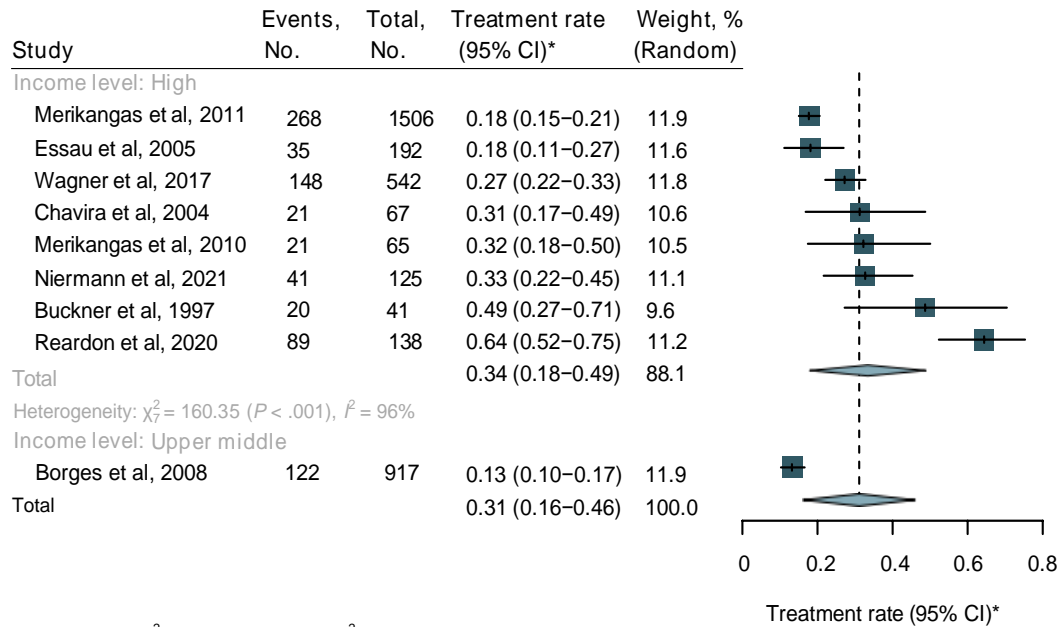

Heterogeneity:  $\chi^2 = 205.69$  ( $P < .001$ ),  $I^2 = 96\%$   
 Test for subgroup differences:  $\chi^2 = 12.61$  ( $P < .001$ )  
 \*95% CI adjusted by Bonferroni correction

**eFigure 18. Treatment rates for anxiety disorders by income groups**

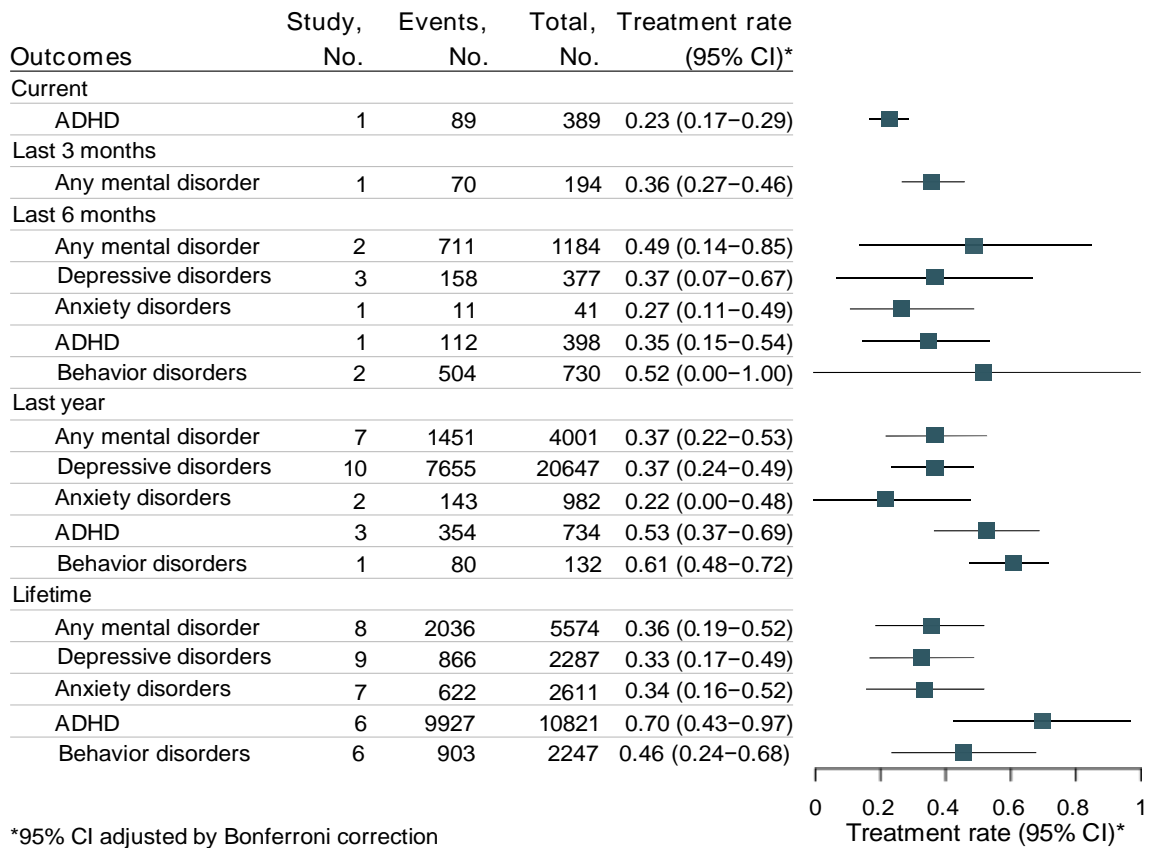

\*95% CI adjusted by Bonferroni correction

**eFigure 19. Subgroup by timeframe**



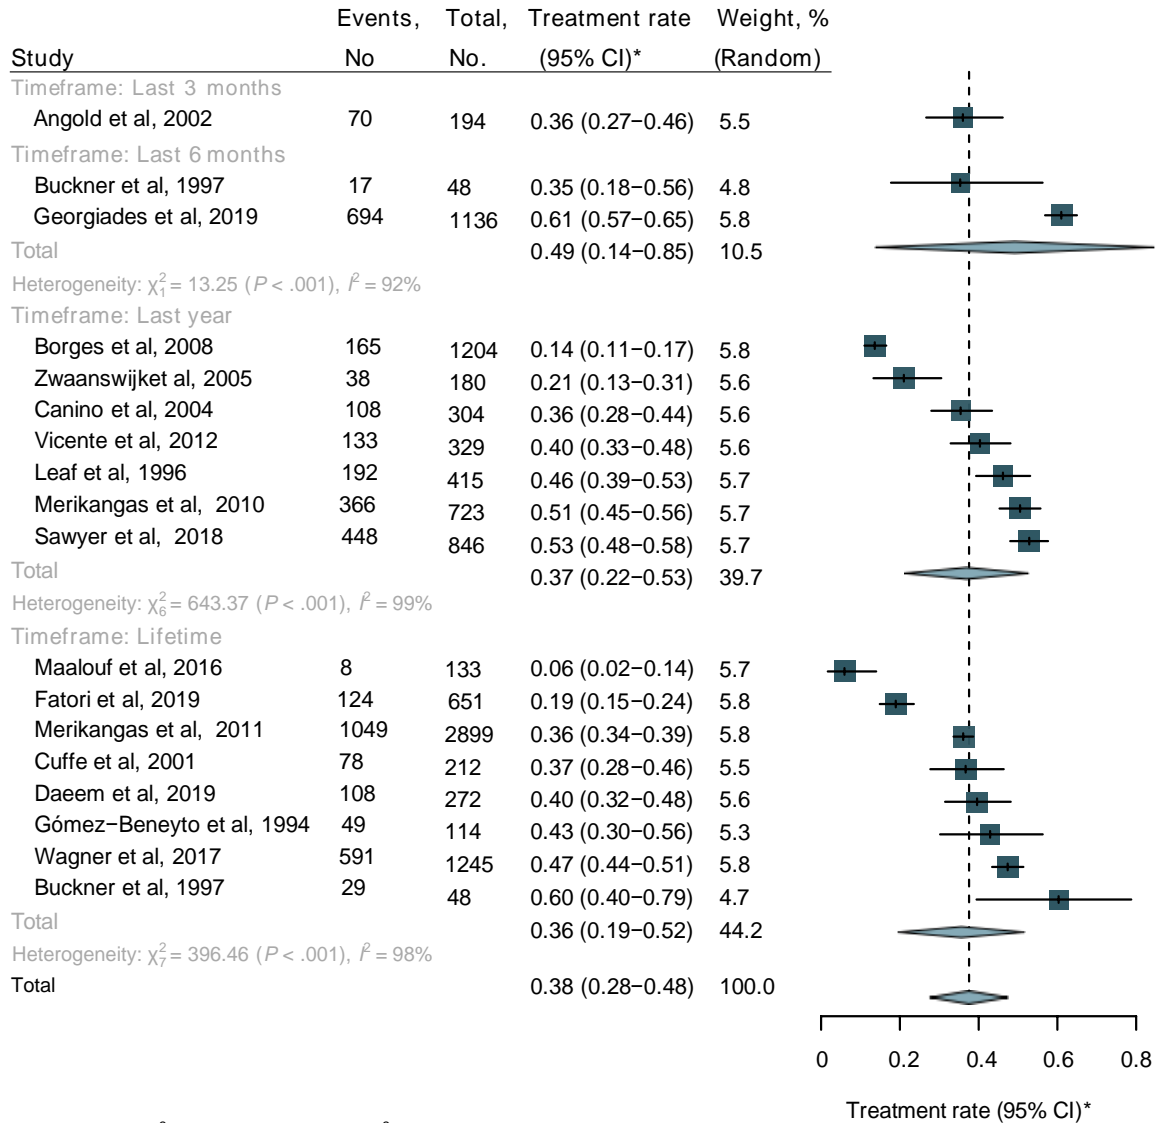

Heterogeneity:  $\chi^2_{17} = 1416.10$  ( $P < .001$ ),  $I^2 = 99\%$

Test for subgroup differences:  $\chi^2_3 = 1.02$  ( $P = .80$ )

\*95% CI adjusted by Bonferroni correction

**eFigure 20. Treatment rates for any mental disorder by timeframes**

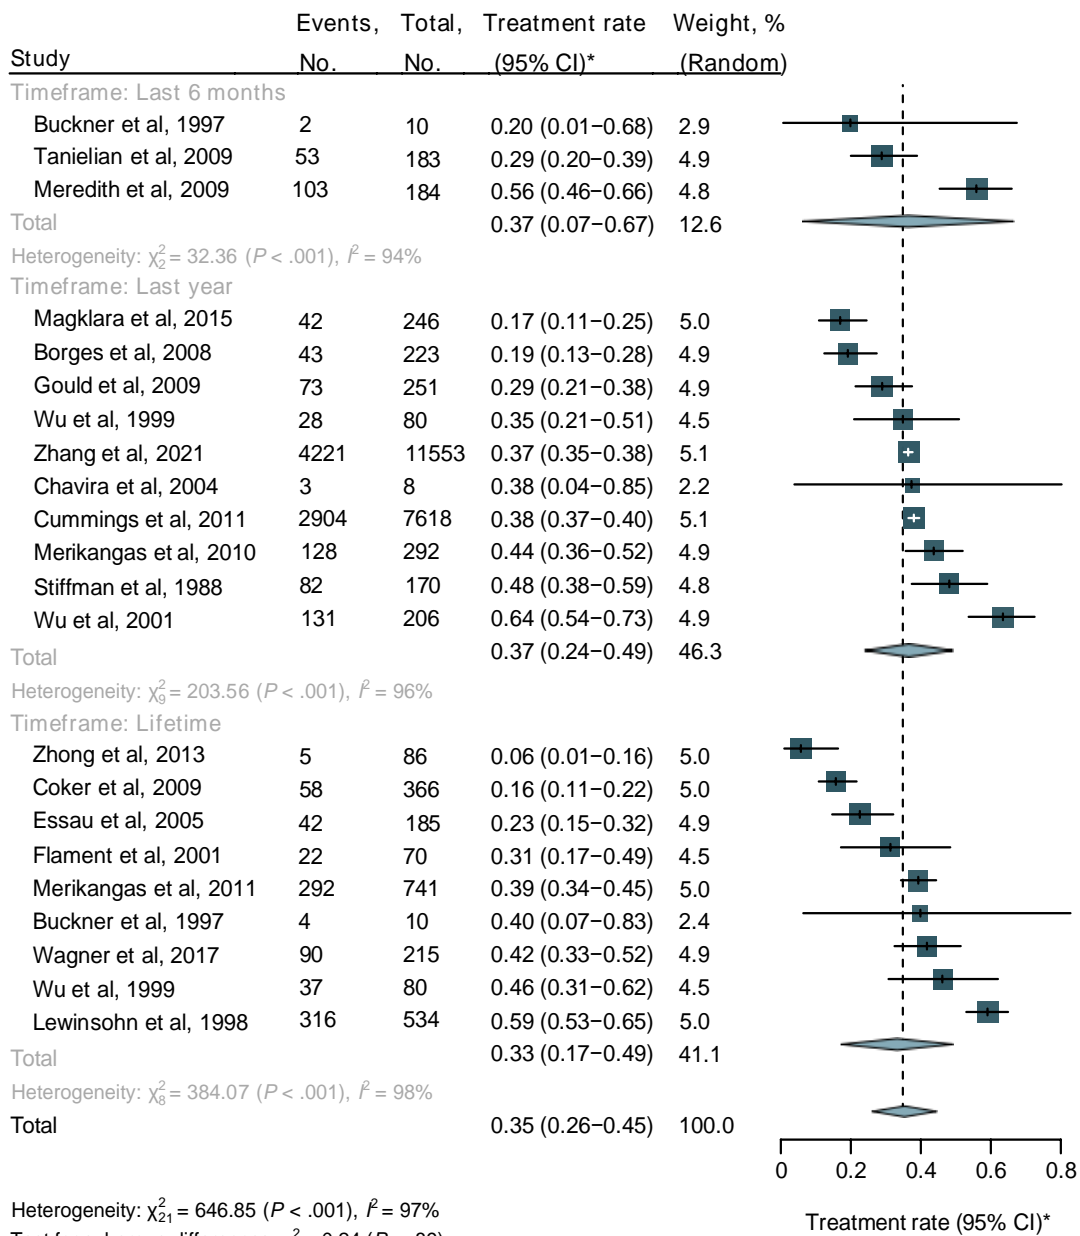

Heterogeneity:  $\chi^2_{21} = 646.85$  ( $P < .001$ ),  $I^2 = 97\%$   
 Test for subgroup differences:  $\chi^2_2 = 0.24$  ( $P = .89$ )

\*95% CI adjusted by Bonferroni correction

**eFigure 21. Treatment rates for depressive disorders by timeframes**

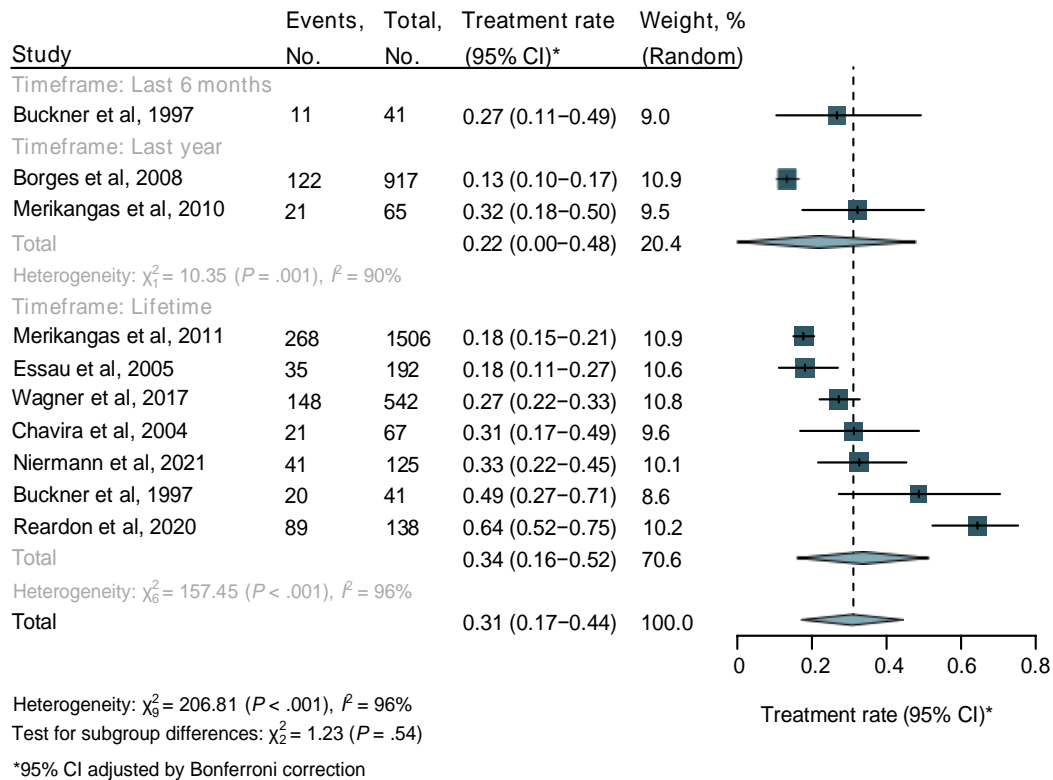

**eFigure 22. Treatment rates for anxiety disorders by timeframes**

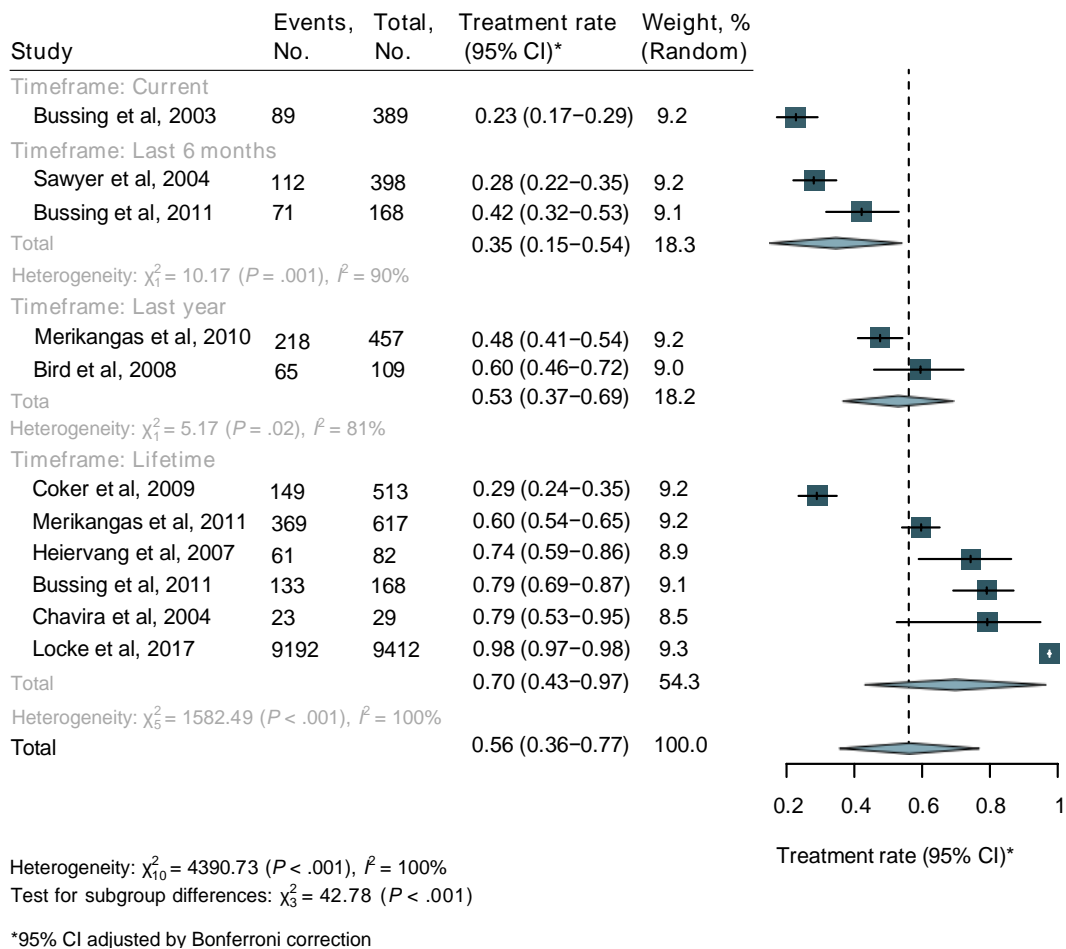

**eFigure 23. Treatment rates for ADHD by timeframes**

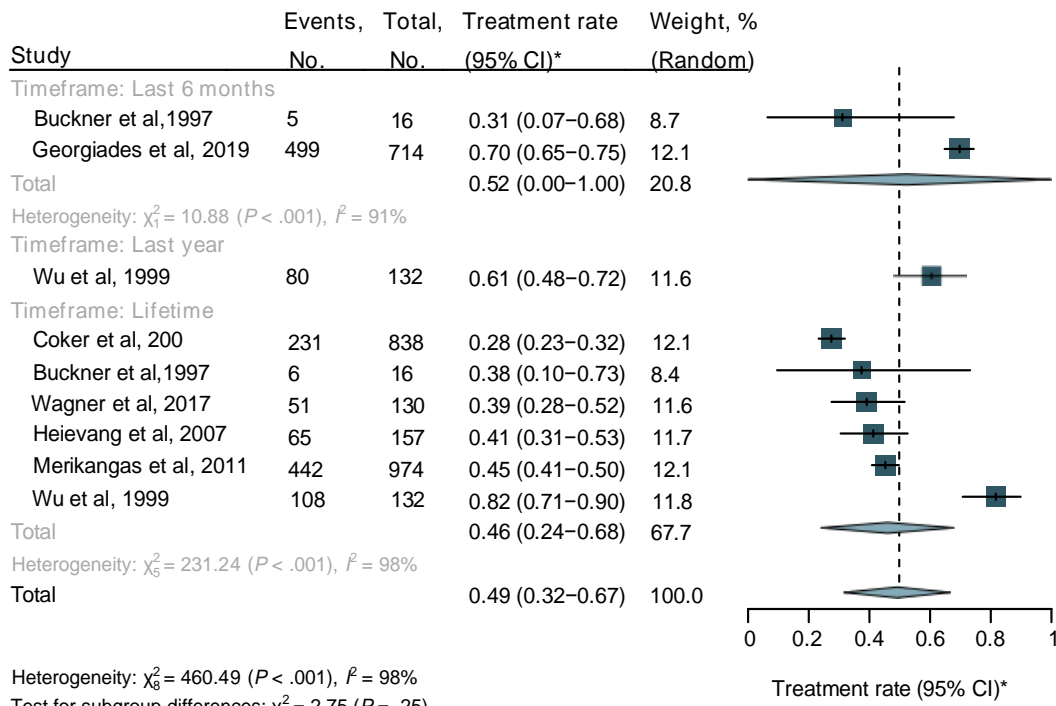

Heterogeneity:  $\chi^2_5 = 460.49$  ( $P < .001$ ),  $I^2 = 98\%$   
 Test for subgroup differences:  $\chi^2_2 = 2.75$  ( $P = .25$ )  
 \*95% CI adjusted by Bonferroni correction

**eFigure 24. Treatment rates for behavior disorders by timeframes**

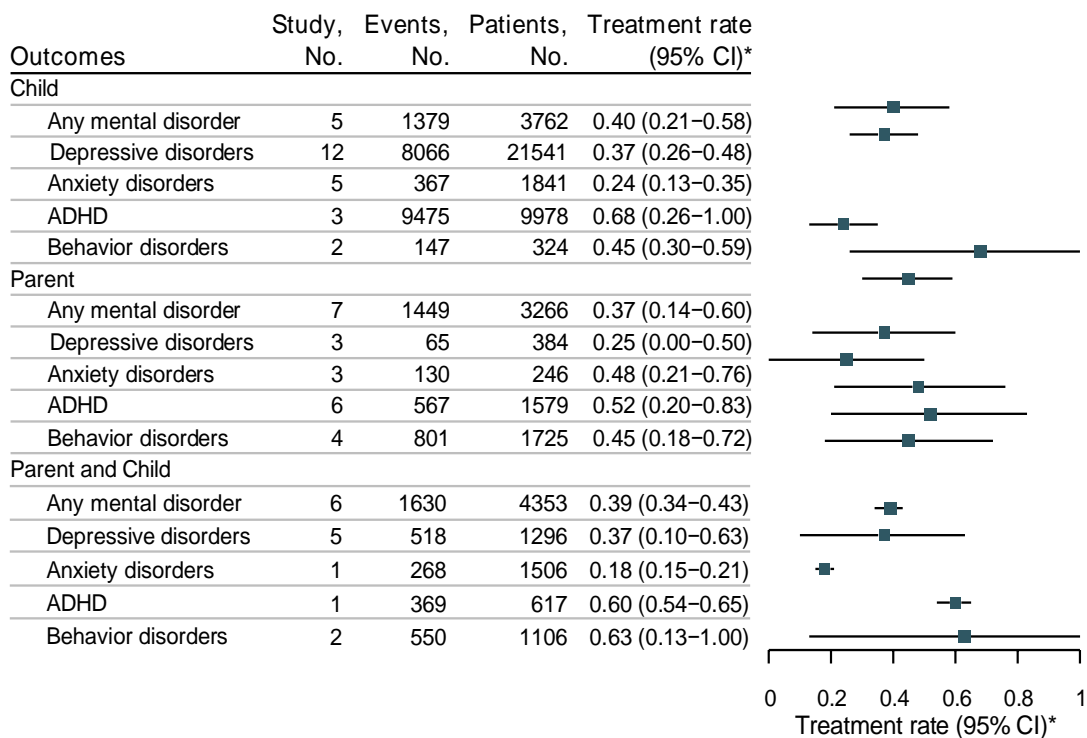

\*95% CI adjusted by Bonferroni correction

**eFigure 25. Subgroup by informant source**

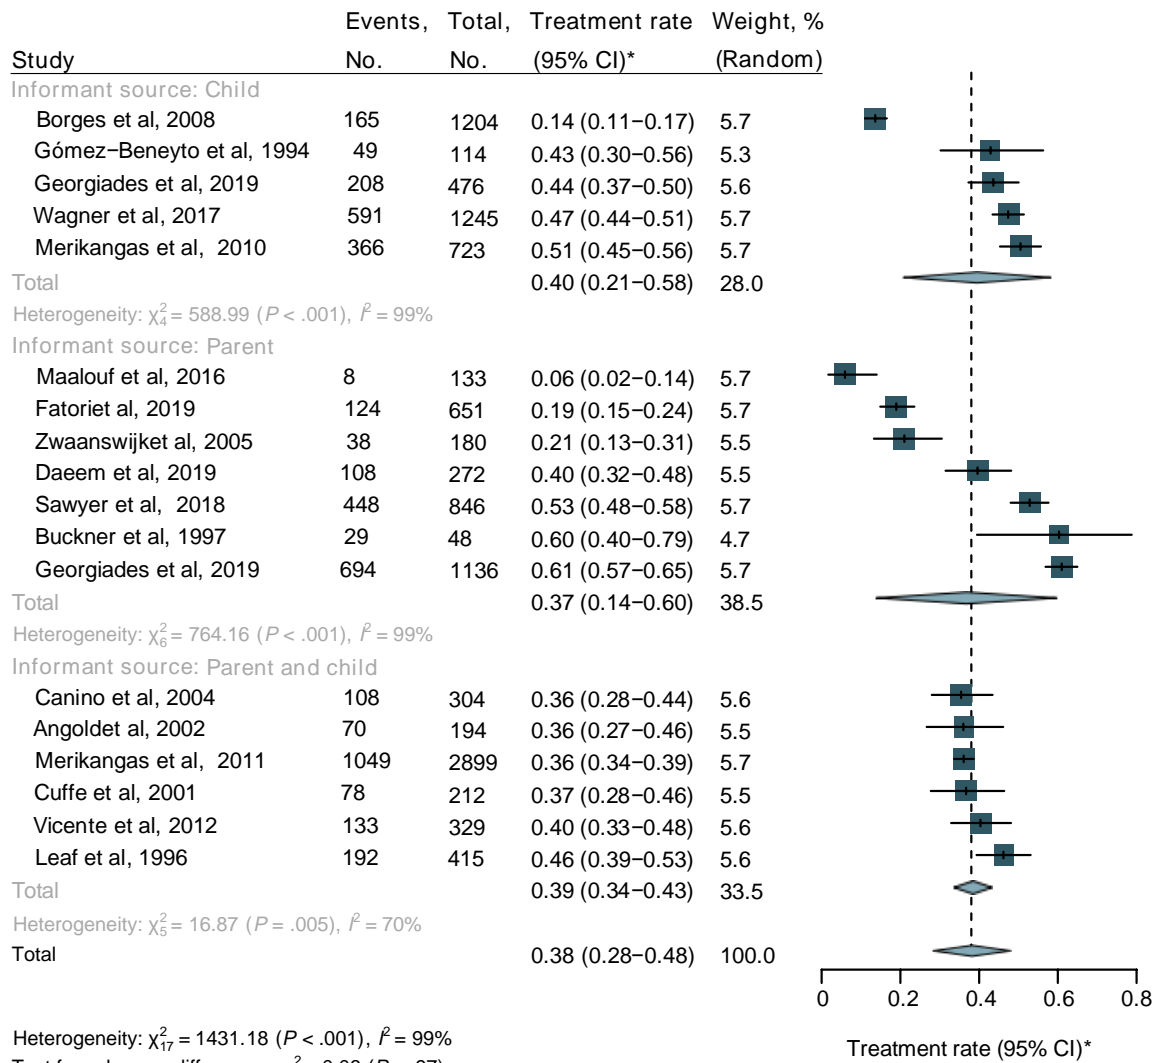

Heterogeneity:  $\chi^2_{17} = 1431.18$  ( $P < .001$ ),  $I^2 = 99\%$

Test for subgroup differences:  $\chi^2_2 = 0.06$  ( $P = .97$ )

\*95% CI adjusted by Bonferroni correction

**eFigure 26. Treatment rates for any mental disorder by informant sources**

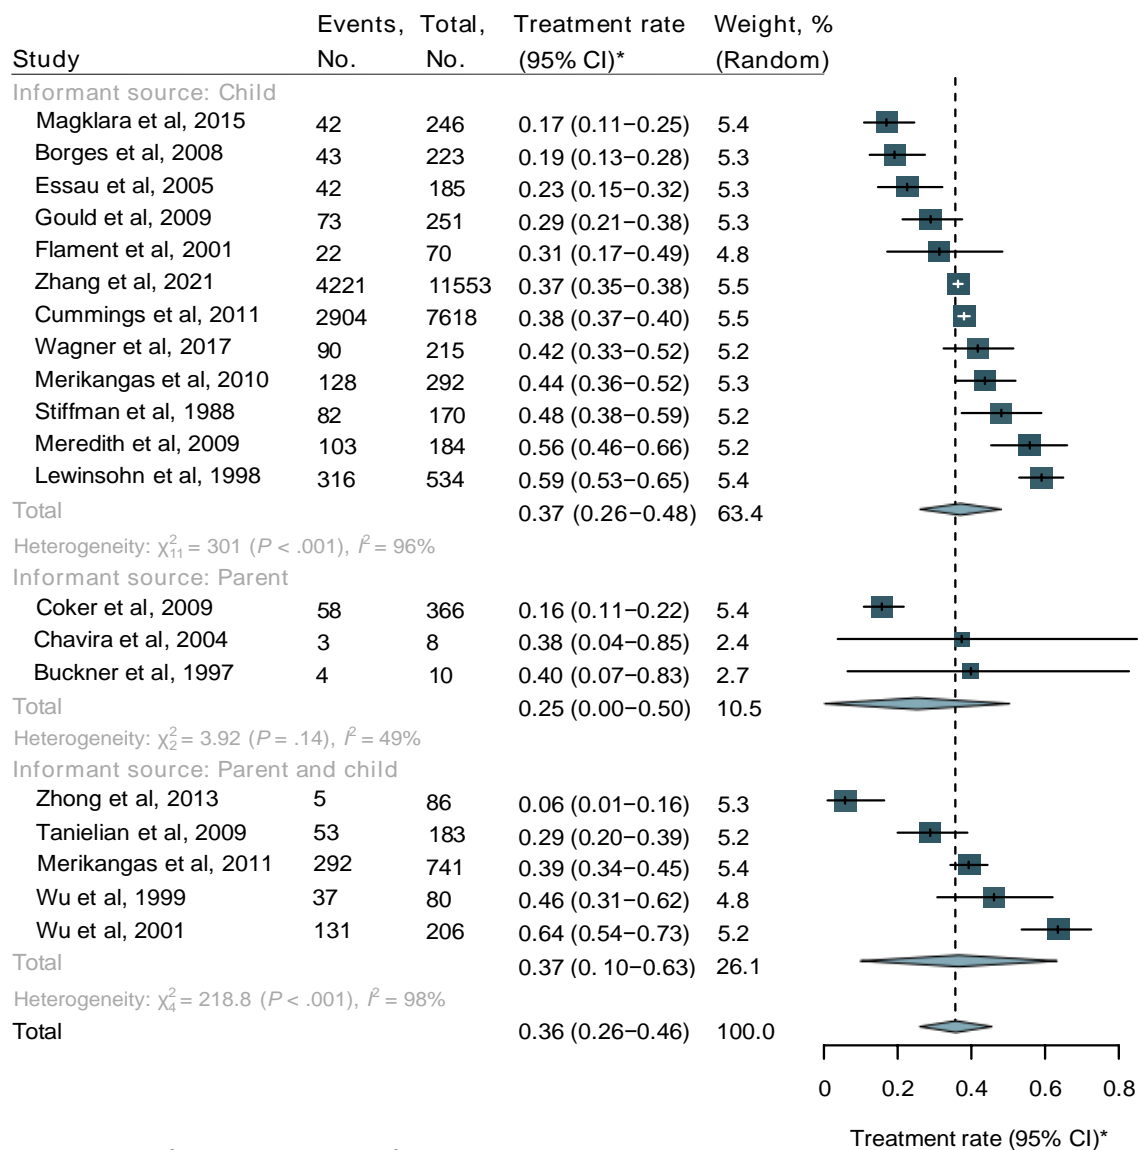

Heterogeneity:  $\chi^2_{19} = 645.13$  ( $P < .001$ ),  $I^2 = 97\%$   
 Test for subgroup differences:  $\chi^2_2 = 1.40$  ( $P = .50$ )  
 \*95% CI adjusted by Bonferroni correction

**eFigure 27. Treatment rates for depressive disorders by informant sources**

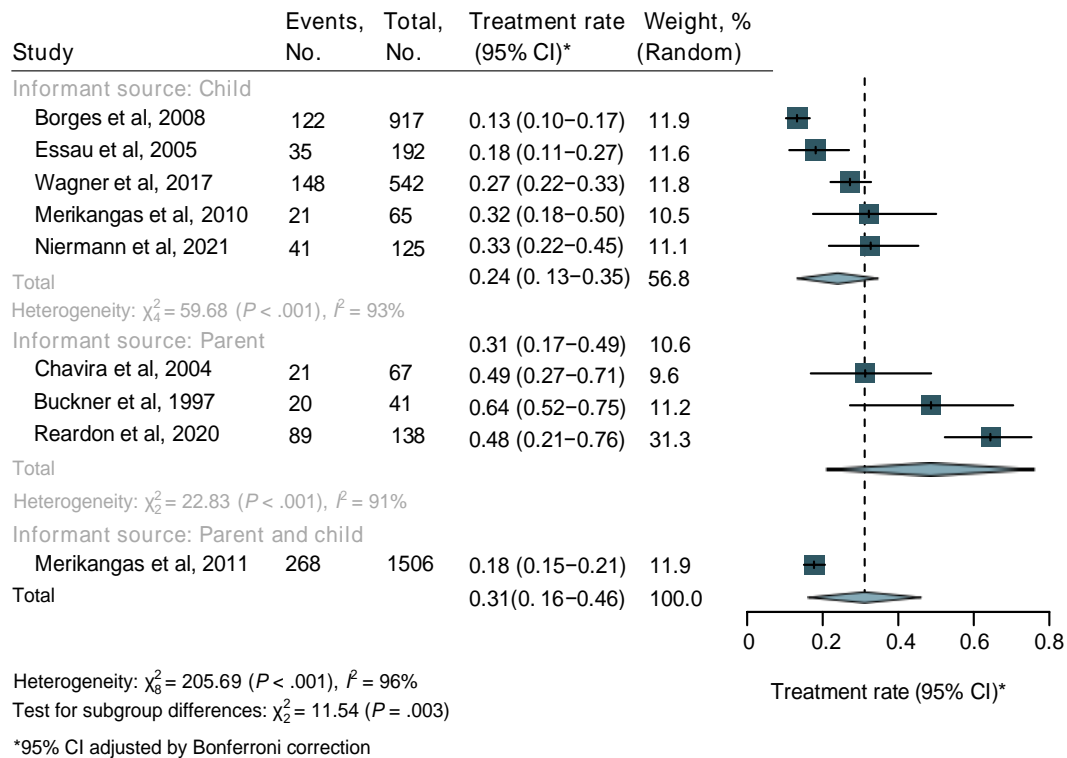

**eFigure 28. Treatment rates for anxiety disorders by informant sources**

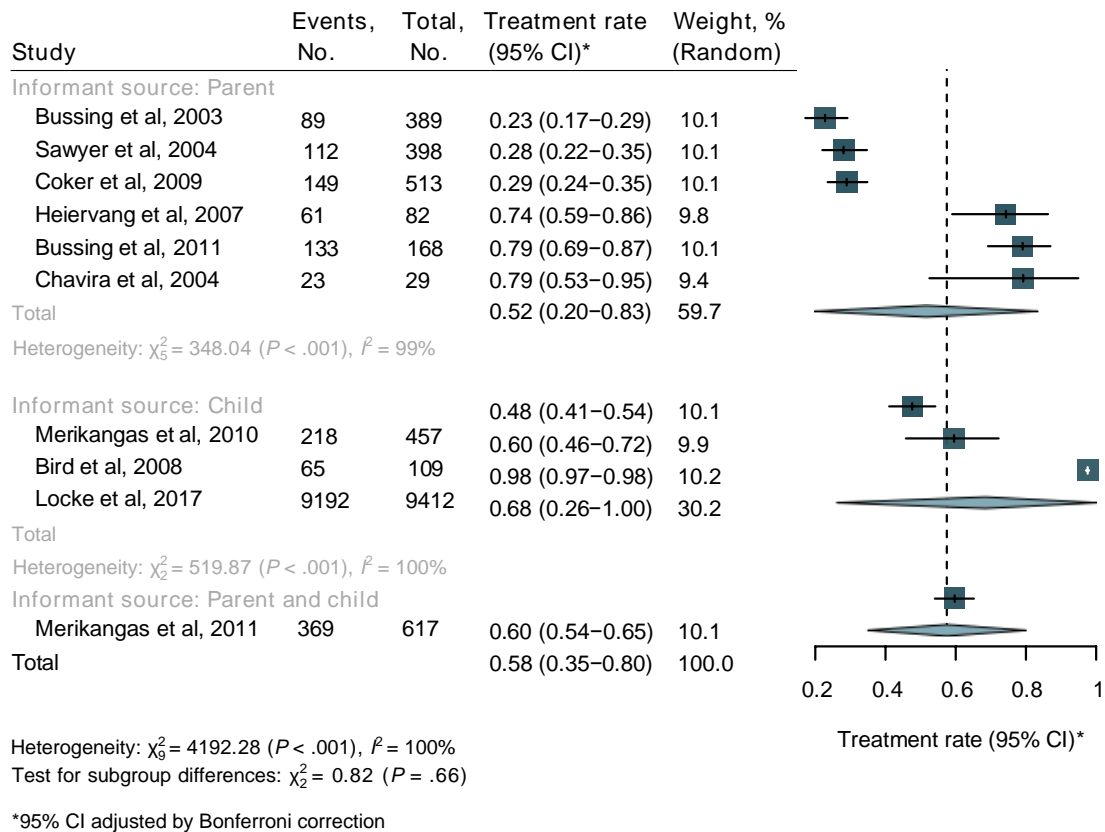

**eFigure 29. Treatment rates for ADHD by informant sources**

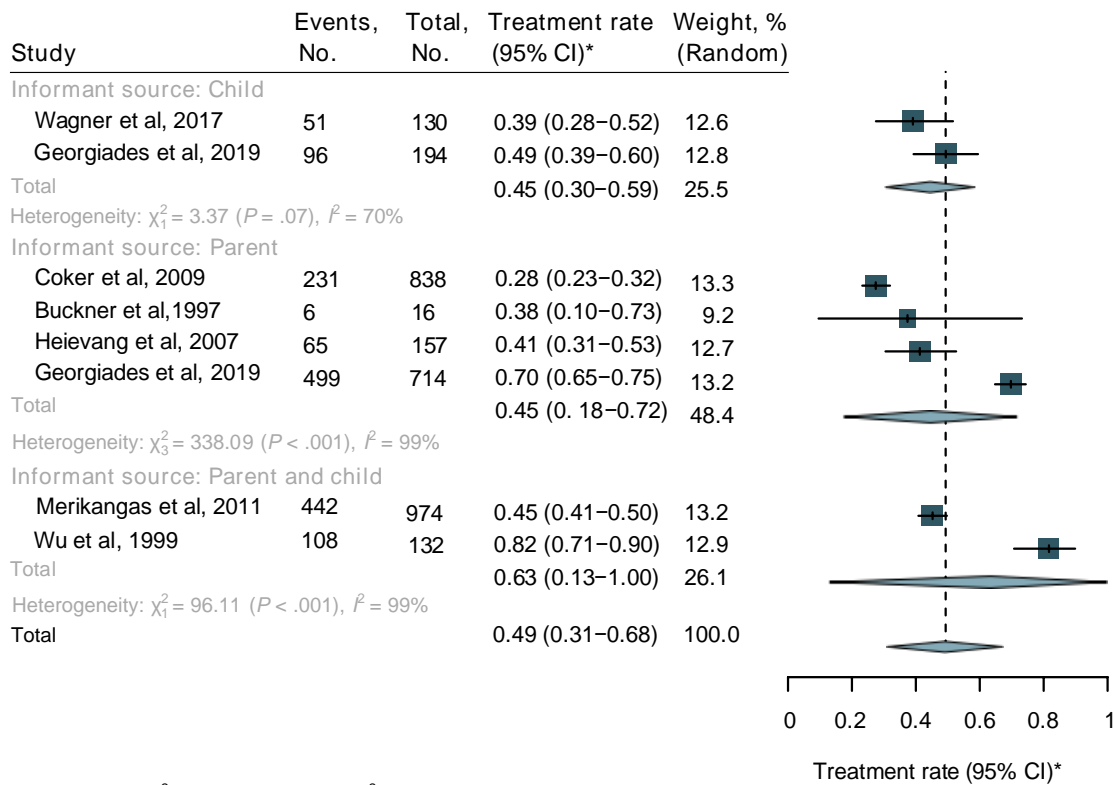

Heterogeneity:  $\chi^2_7 = 449.90$  ( $P < .001$ ),  $I^2 = 98\%$   
 Test for subgroup differences:  $\chi^2_2 = 1.01$  ( $P = .60$ )  
 \*95% CI adjusted by Bonferroni correction

**eFigure 30. Treatment rates for behavior disorders by informant sources**



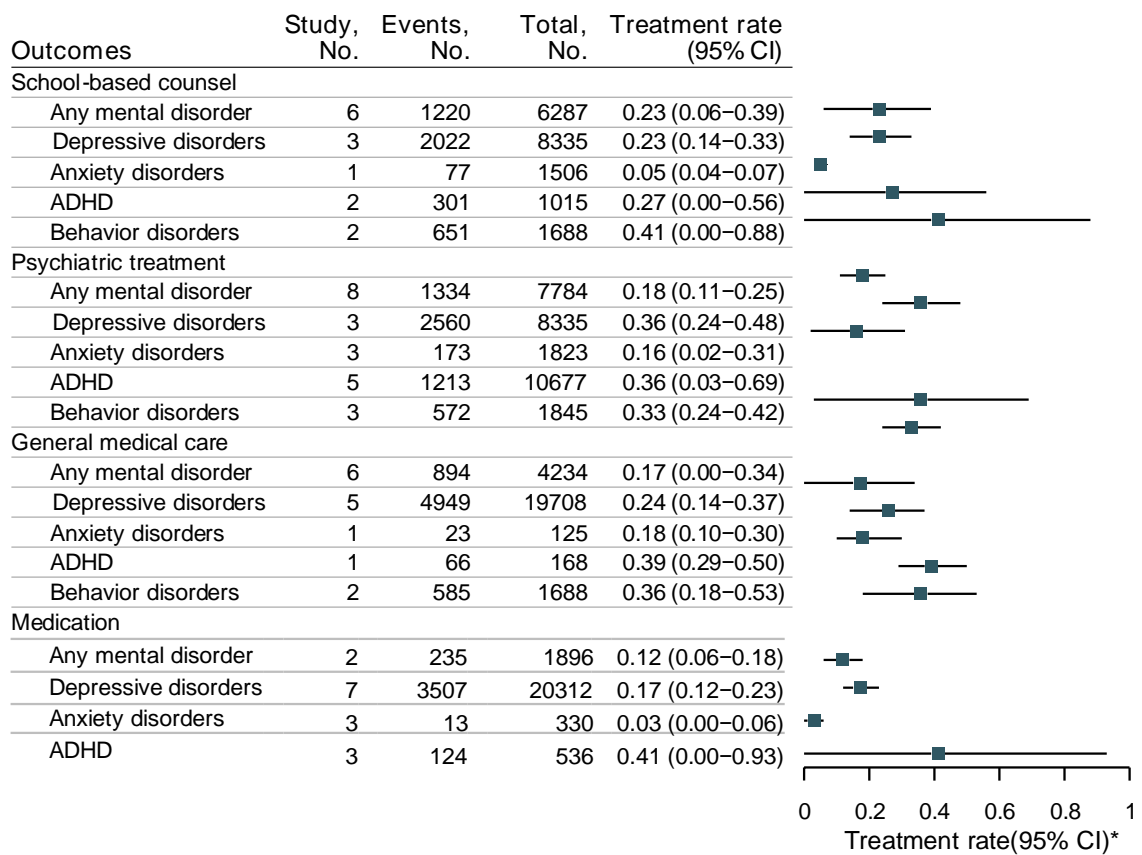

\*95% CI adjusted by Bonferroni correction

**eFigure 31. Subgroup by health service type**

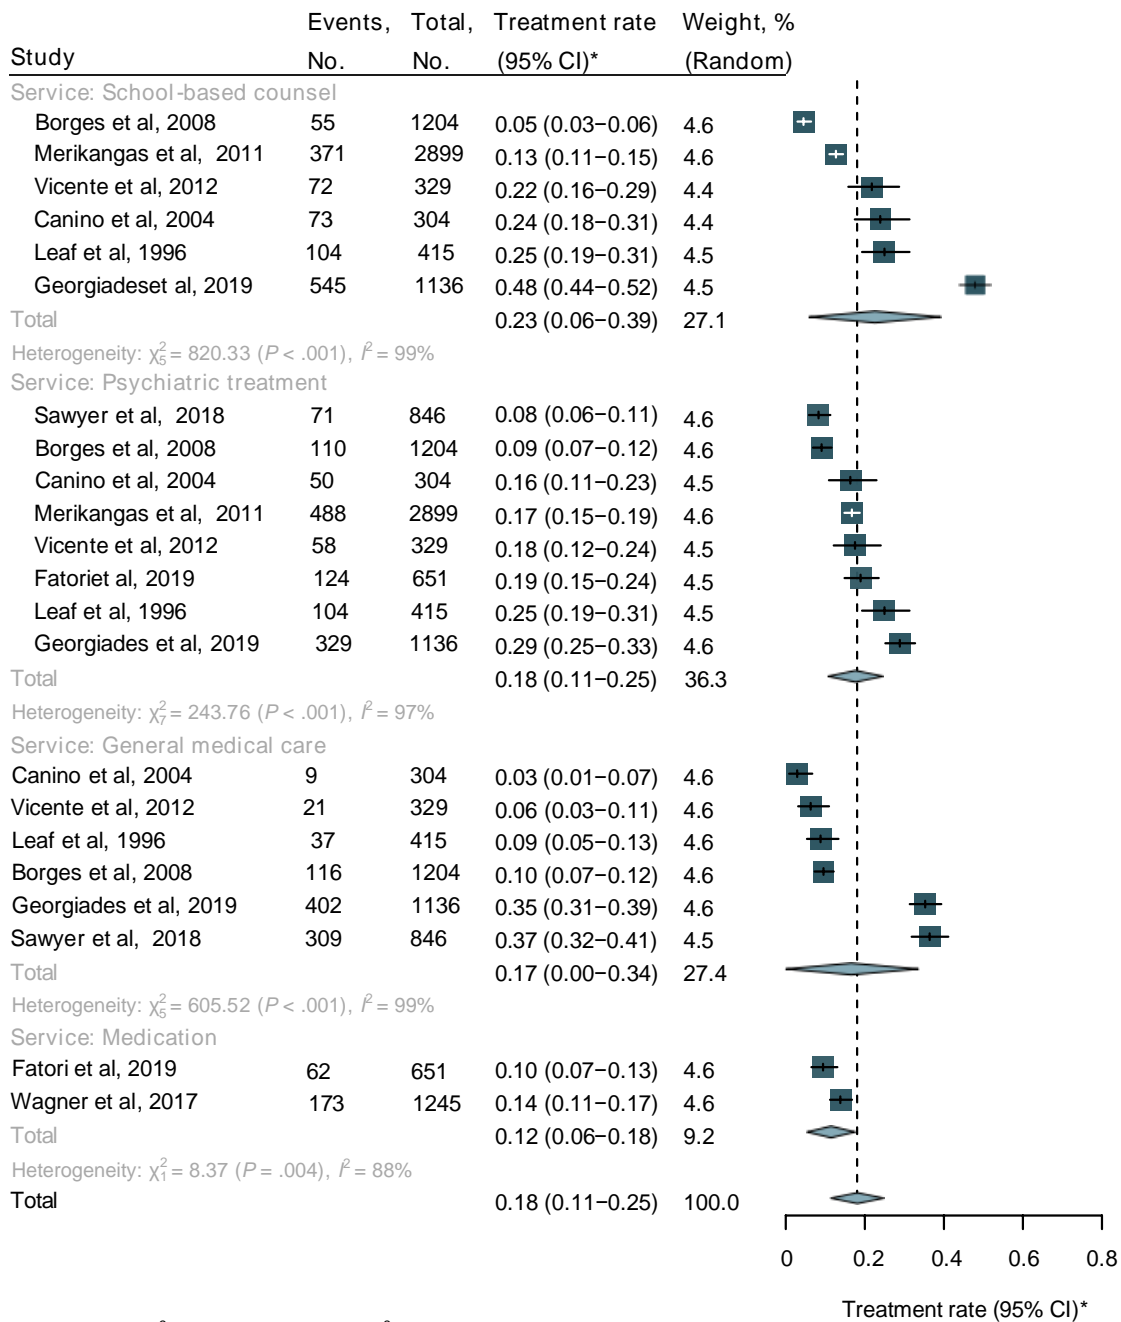

Heterogeneity:  $\chi^2_{21} = 1704.05$  ( $P < .001$ ),  $I^2 = 99\%$

Test for subgroup differences:  $\chi^2_3 = 4.96$  ( $P = .17$ )

\*95% CI adjusted by Bonferroni correction

**eFigure 32. Treatment rates for any mental disorder by health service types**

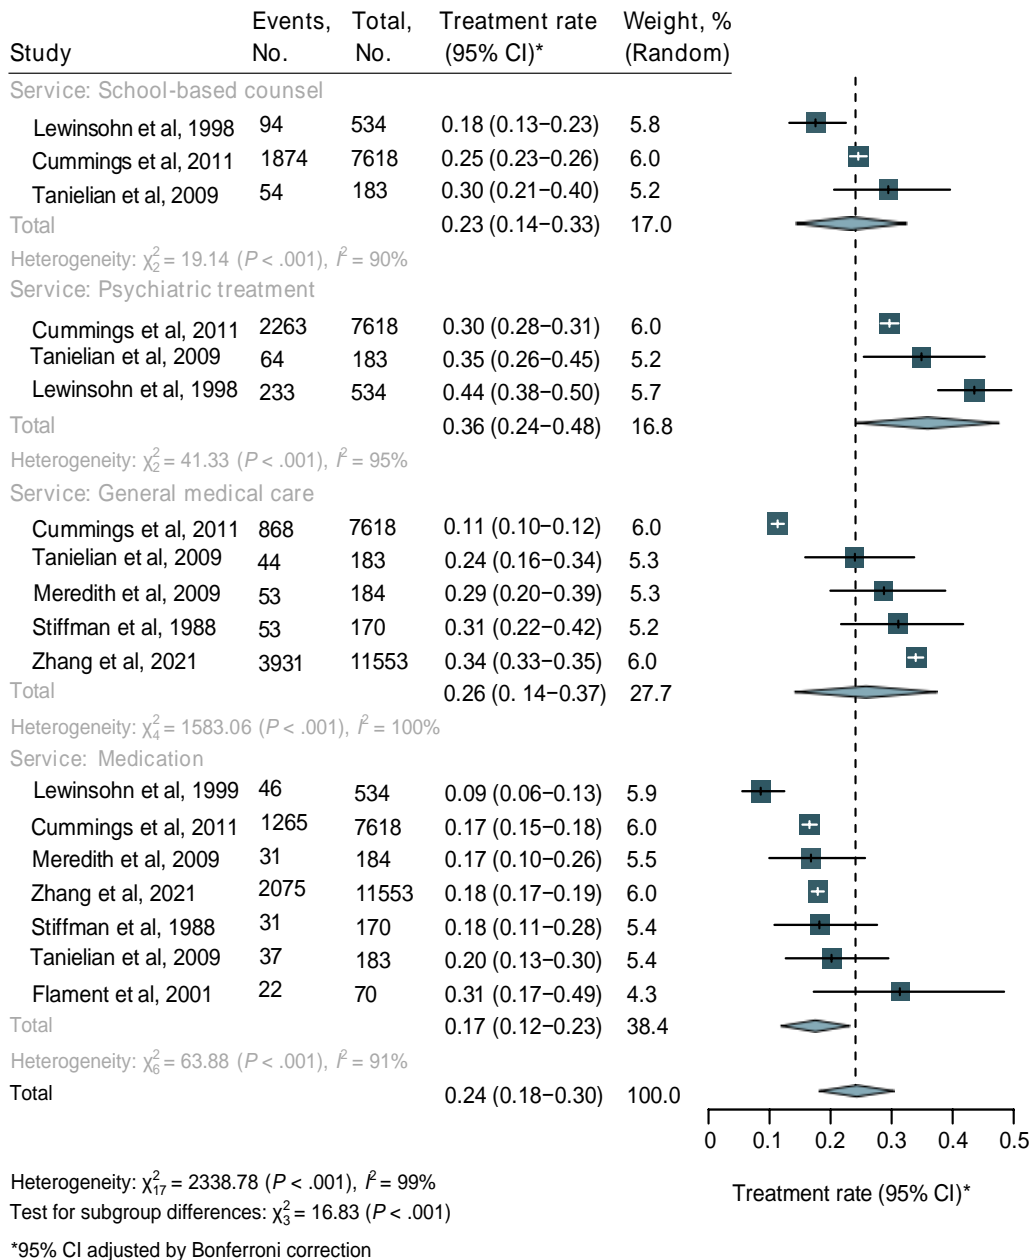

**eFigure 33. Treatment rates for depressive disorders by health service types**

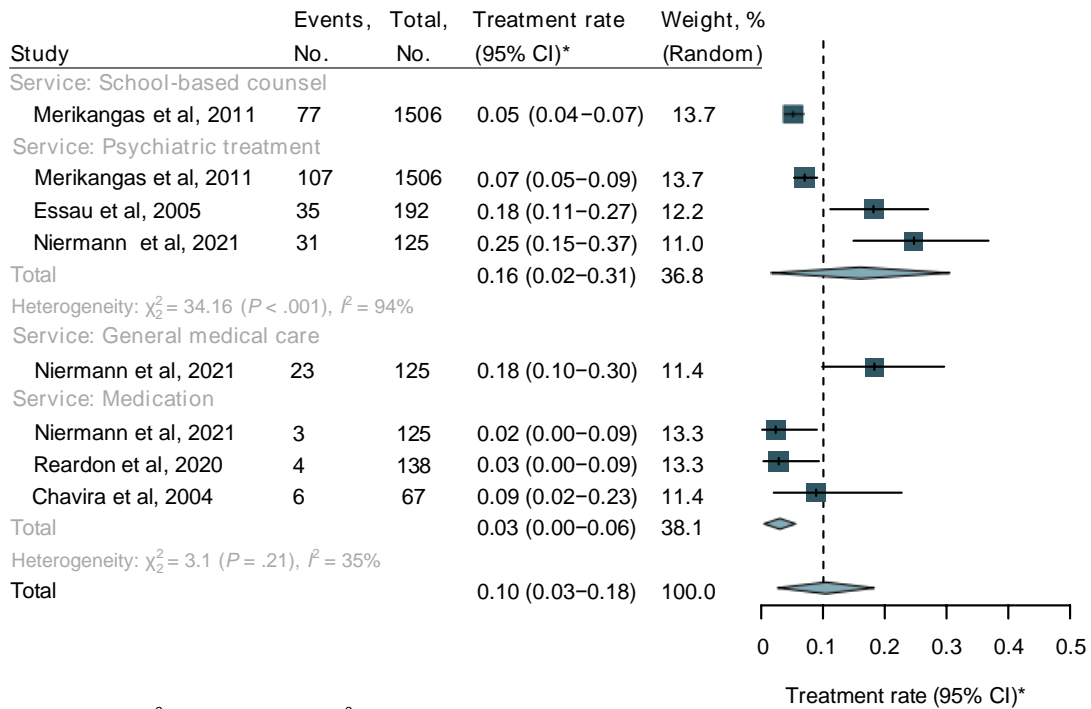

Heterogeneity:  $\chi^2_7 = 73.30$  ( $P < .001$ ),  $I^2 = 90\%$   
 Test for subgroup differences:  $\chi^2_3 = 23.47$  ( $P < .001$ )

\*95% CI adjusted by Bonferroni correction

**eFigure 34. Treatment rates for anxiety disorders by health service types**

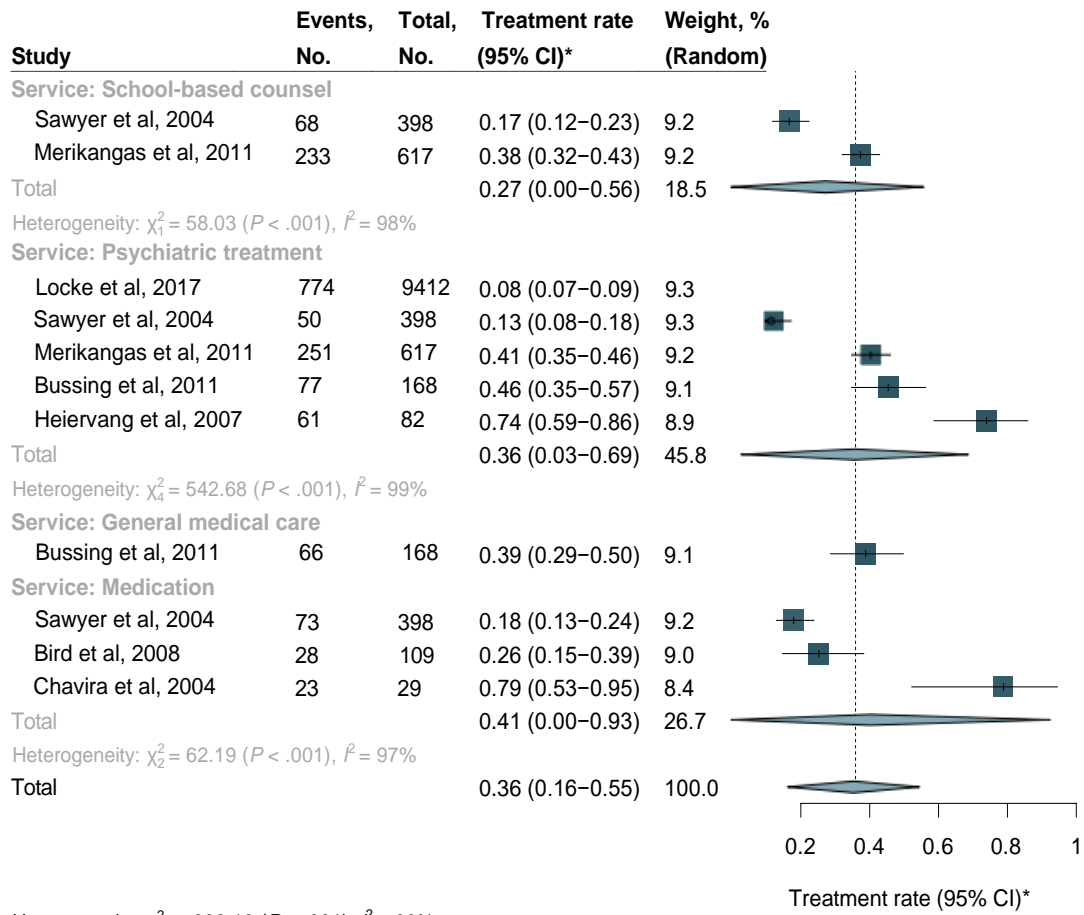

Heterogeneity:  $\chi^2_{10} = 938.10$  ( $P < .001$ ),  $I^2 = 99\%$

Test for subgroup differences:  $\chi^2_3 = 1.21$  ( $P = .75$ )

\*95% CI adjusted by Bonferroni correction

**eFigure 35. Treatment rates for ADHD by health service types**

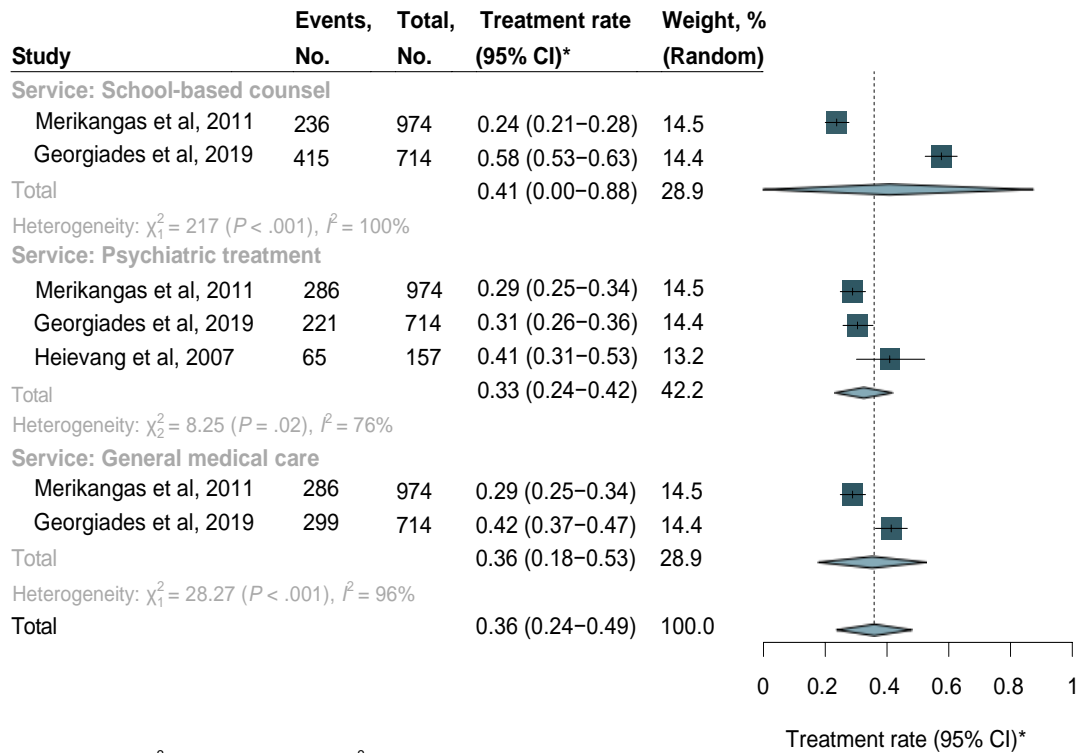

Heterogeneity:  $\chi^2_6 = 266.19$  ( $P < .001$ ),  $I^2 = 98\%$

Test for subgroup differences:  $\chi^2_2 = 0.32$  ( $P = .85$ )

\*95% CI adjusted by Bonferroni correction

**eFigure 36. Treatment rates for behavior disorders by health service types**

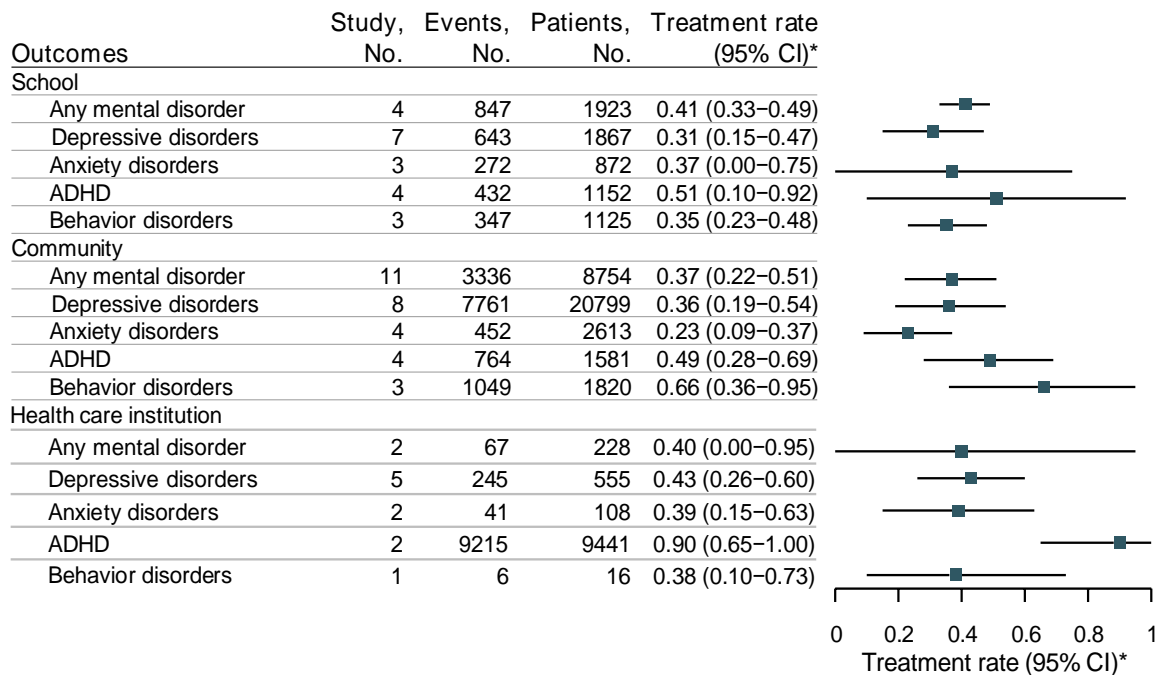

\*95% CI adjusted by Bonferroni correction

**eFigure 37. Subgroup by sample origin population**

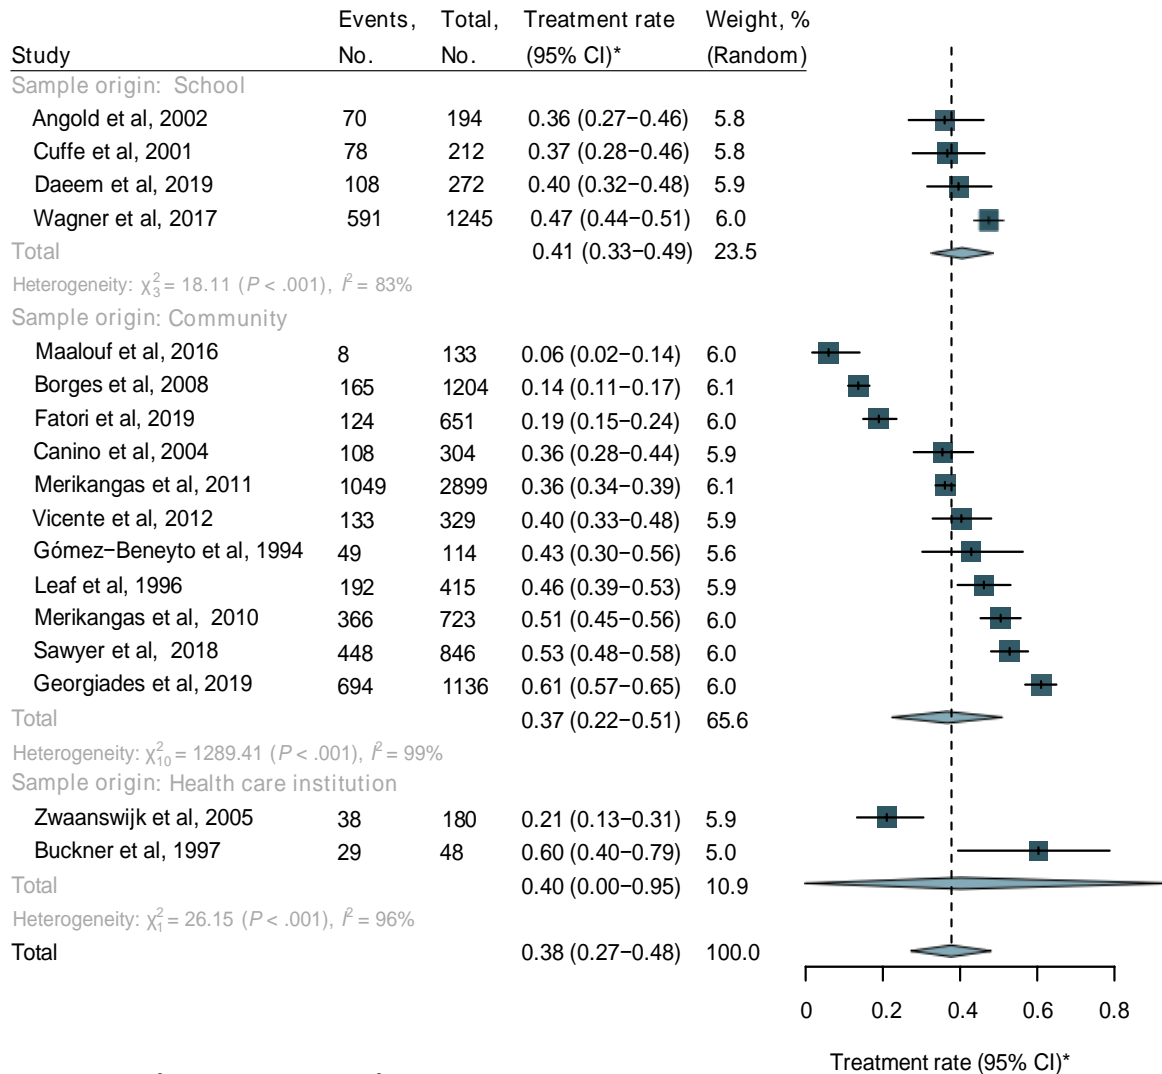

Heterogeneity:  $\chi^2_{16} = 1416.09$  ( $P < .001$ ),  $I^2 = 99\%$

Test for subgroup differences:  $\chi^2_2 = 0.41$  ( $P = .81$ )

\*95% CI adjusted by Bonferroni correction

**eFigure 38. Treatment rates for any mental disorder by the sample origin population**

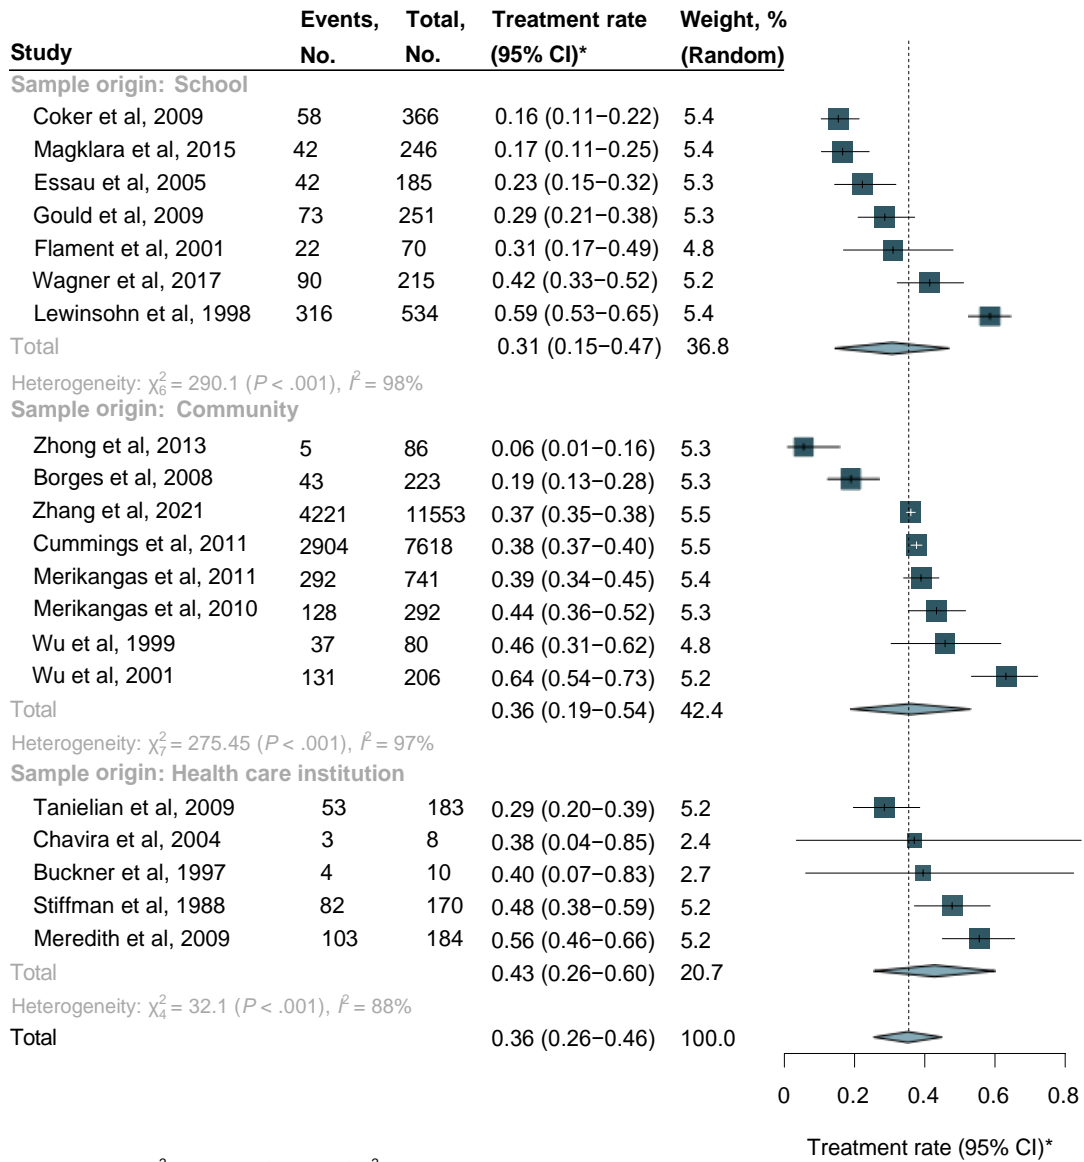

Heterogeneity:  $\chi^2_{19} = 645.13$  ( $P < .001$ ),  $I^2 = 97\%$   
 Test for subgroup differences:  $\chi^2_2 = 2.06$  ( $P = .36$ )  
 \*95% CI adjusted by Bonferroni correction

**eFigure 39. Treatment rates for depressive disorders by the sample origin population**



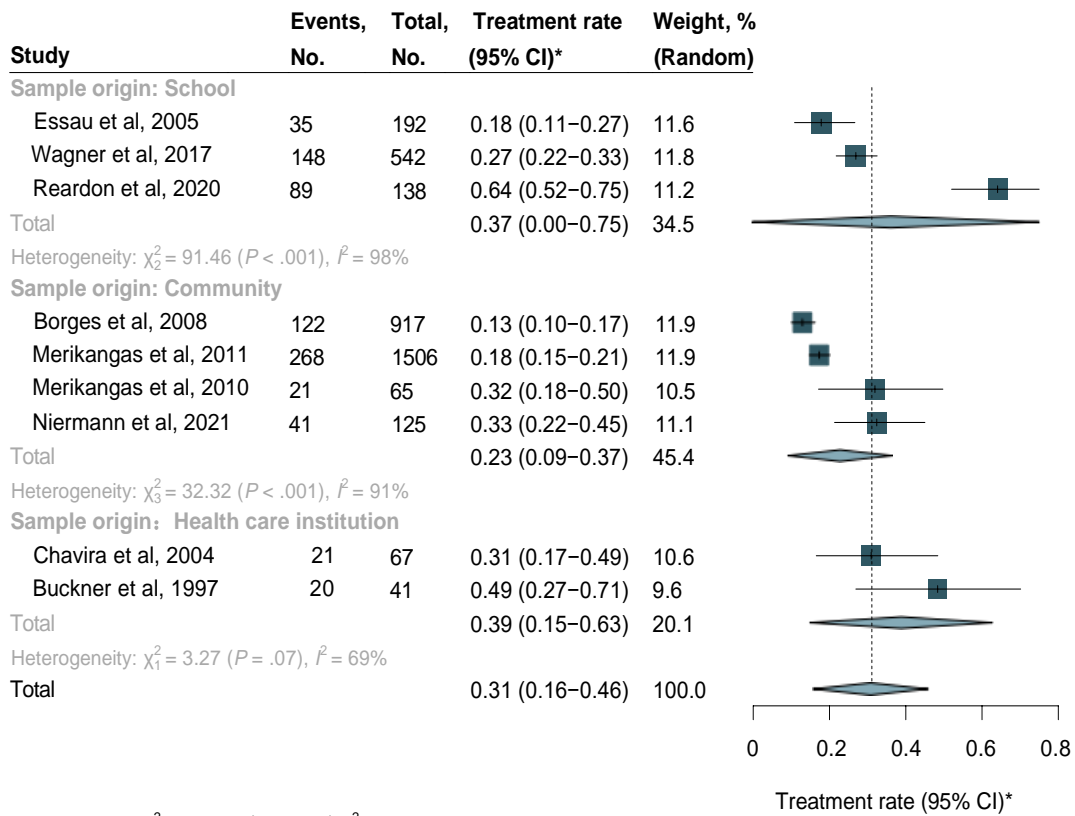

Heterogeneity:  $\chi^2 = 205.69$  ( $P < .001$ ),  $I^2 = 96\%$

Test for subgroup differences:  $\chi^2 = 3.03$  ( $P = .22$ )

\*95% CI adjusted by Bonferroni correction

**eFigure 40. Treatment rates for anxiety disorders by the sample origin population**

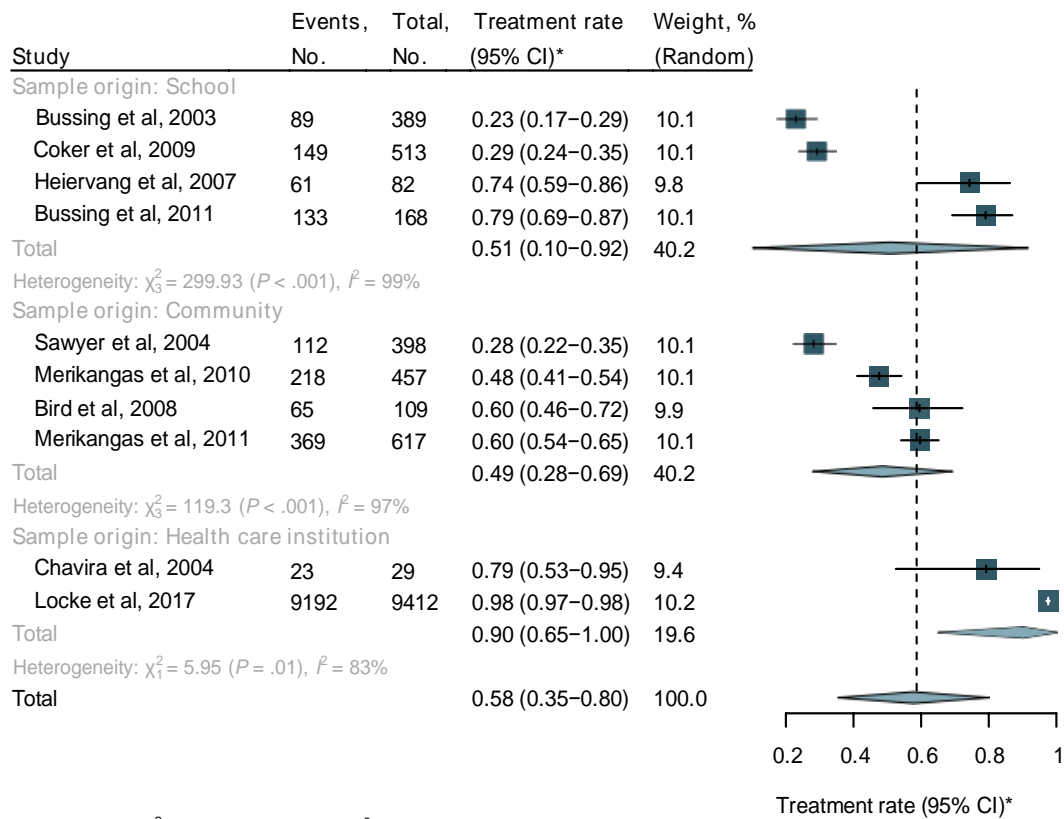

Heterogeneity:  $\chi^2_9 = 4192.28$  ( $P < .001$ ),  $I^2 = 100\%$   
 Test for subgroup differences:  $\chi^2_2 = 13.22$  ( $P = .001$ )

\*95% CI adjusted by Bonferroni correction

**eFigure 41. Treatment rates for ADHD by the sample origin population**

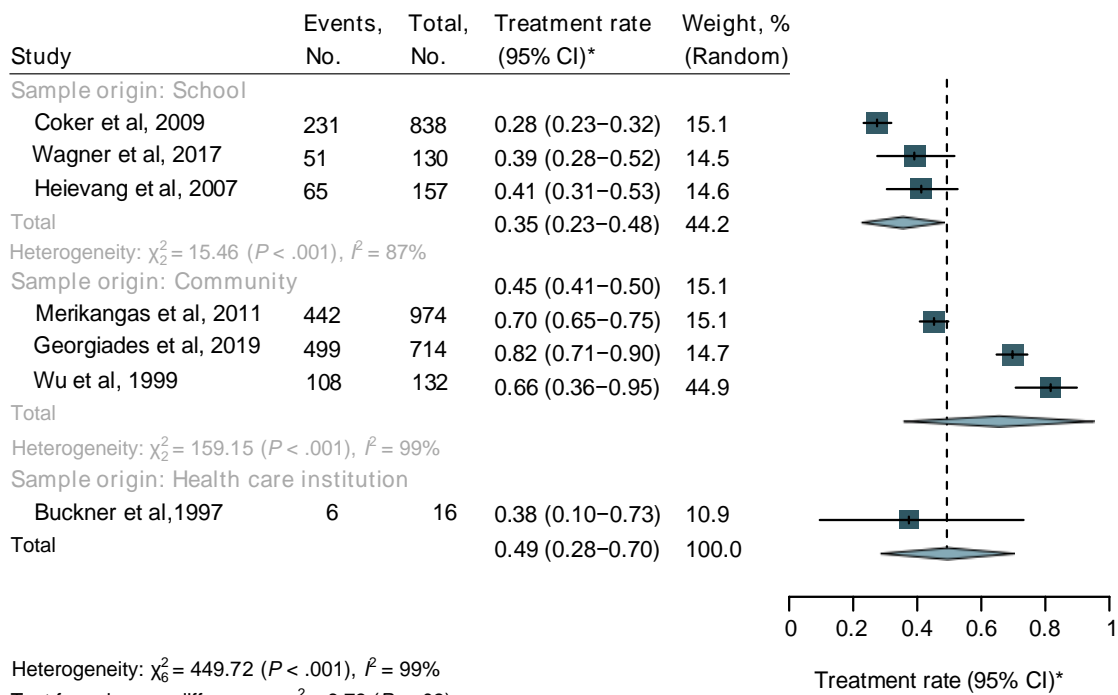

Heterogeneity:  $\chi^2_6 = 449.72$  ( $P < .001$ ),  $I^2 = 99\%$   
 Test for subgroup differences:  $\chi^2_2 = 6.73$  ( $P = .03$ )

\*95% CI adjusted by Bonferroni correction

**eFigure 42. Treatment rates for behavior disorders by the sample origin population**

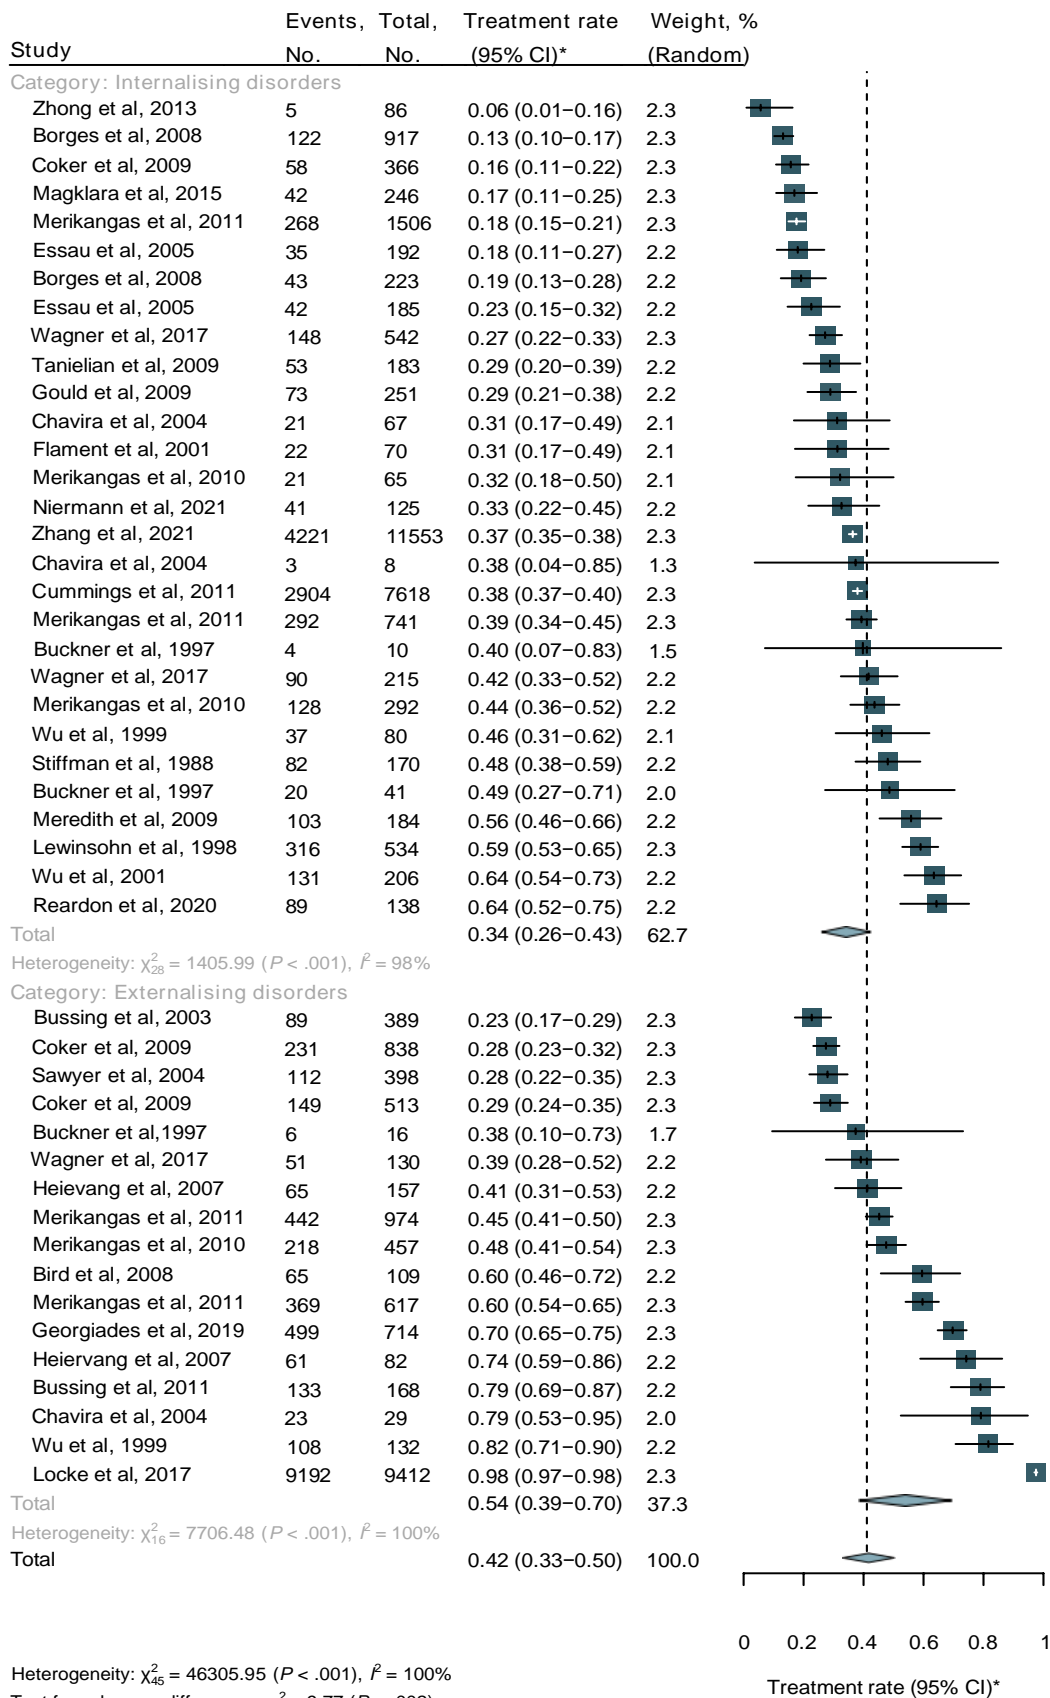

**eFigure 43. Treatment rates for internalizing and externalizing disorders**

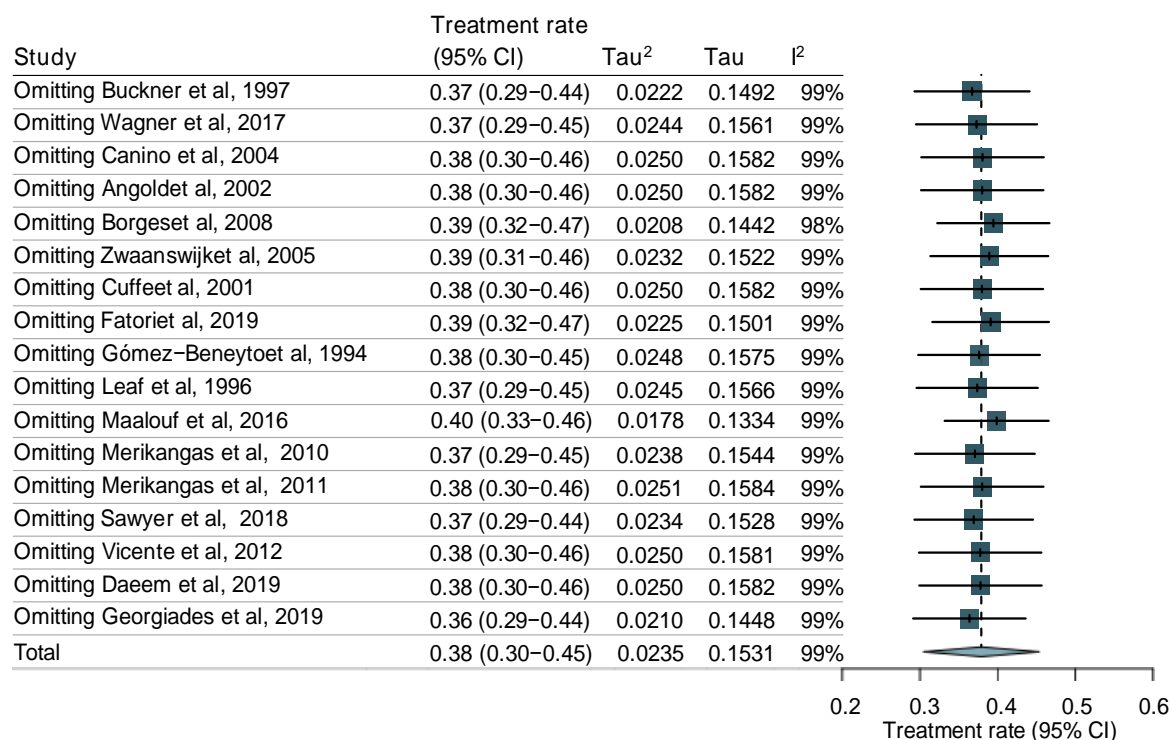

**eFigure 44. Sensitivity analysis forest plots for any mental disorder**

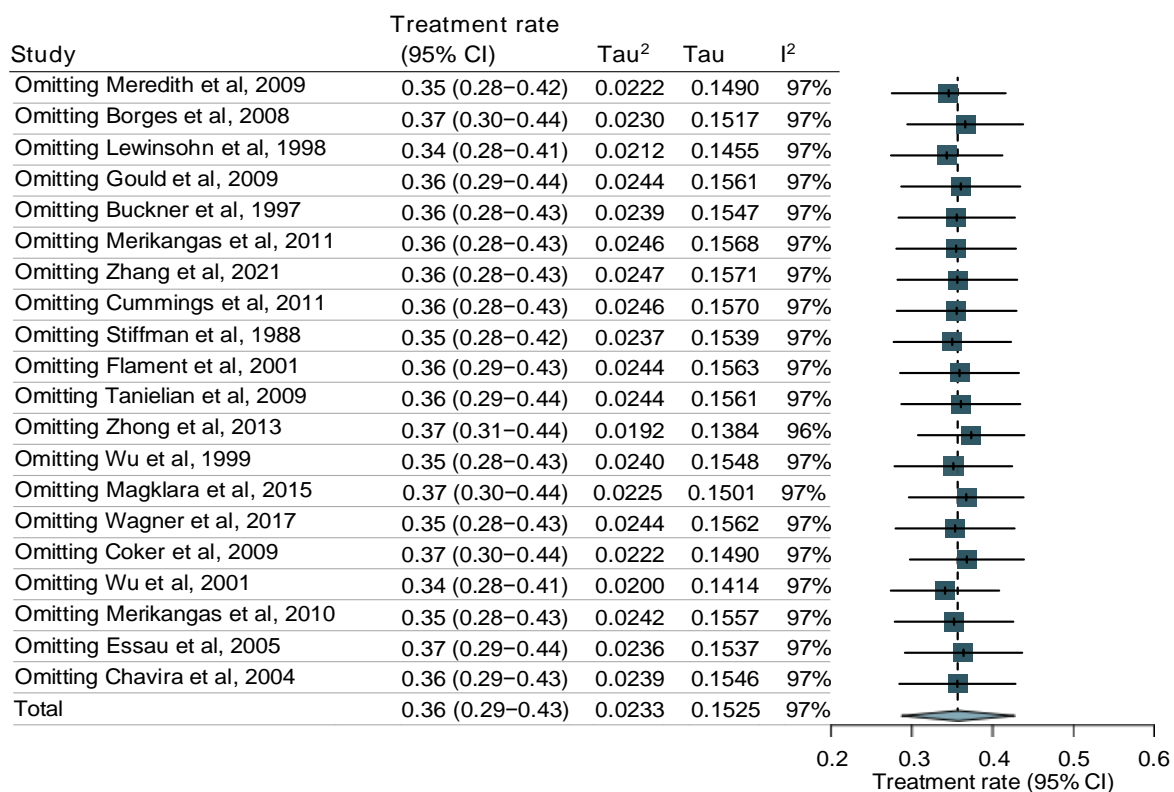

**eFigure 45. Sensitivity analysis forest plots for depressive disorders**

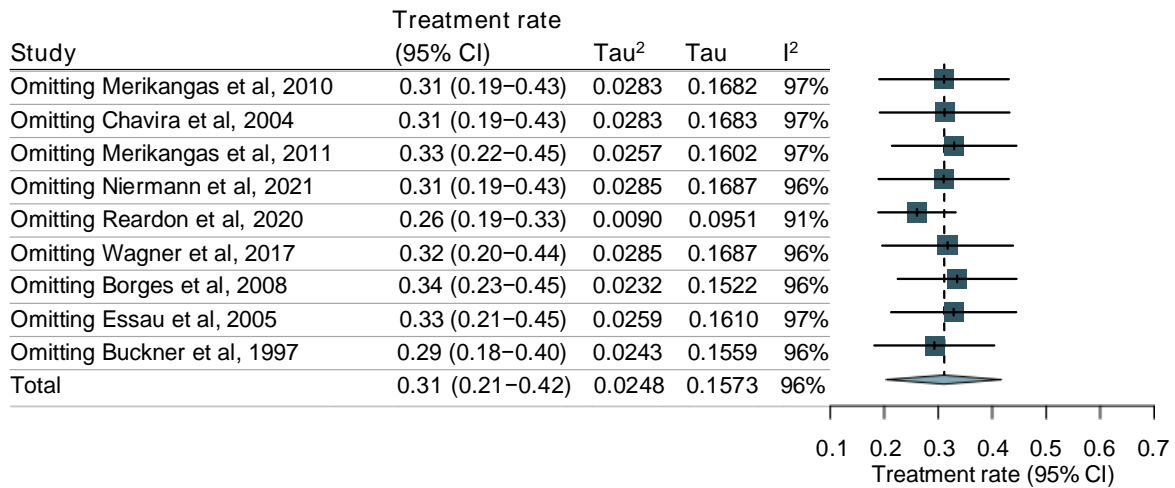

**eFigure 46. Sensitivity analysis forest plots for anxiety disorders**

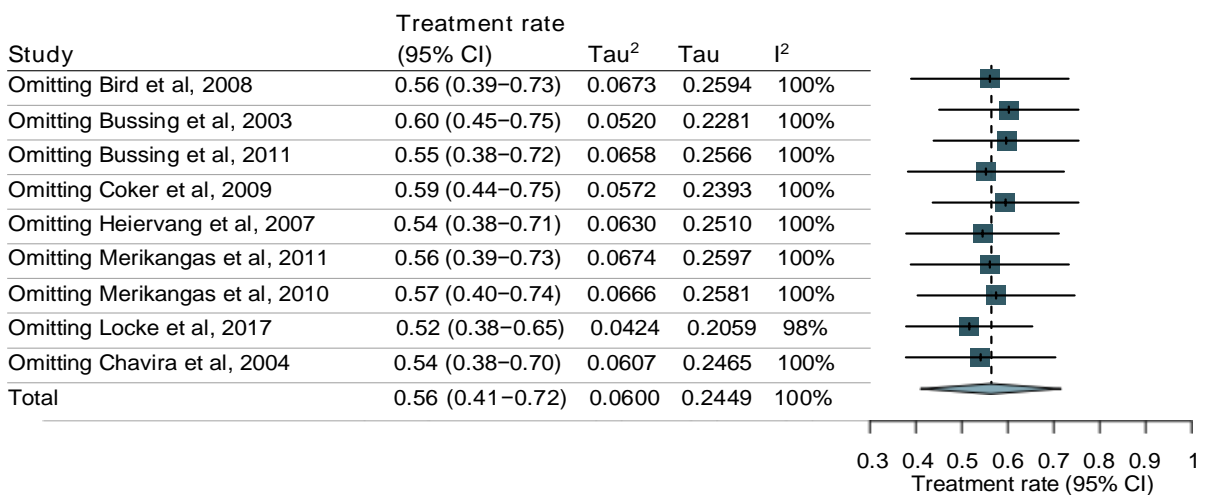

**eFigure 47. Sensitivity analysis forest plots for ADHD**

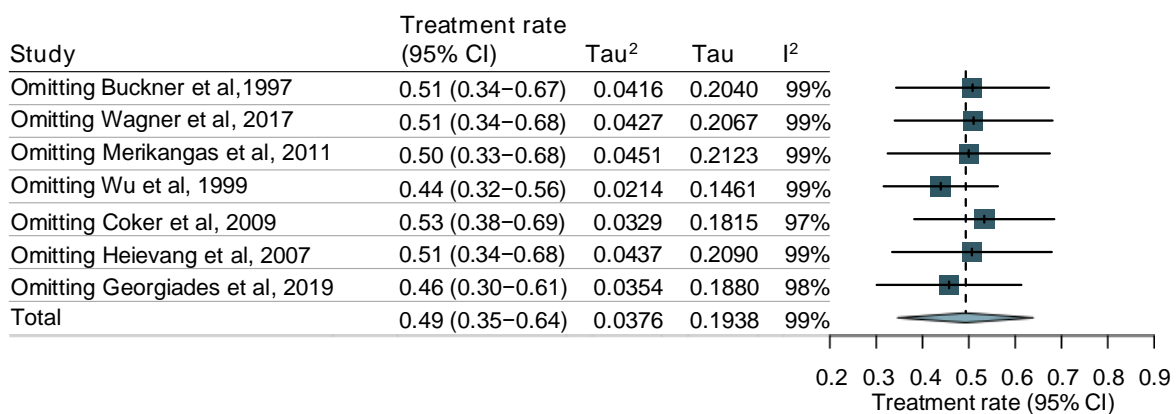

**eFigure 48. Sensitivity analysis forest plots for behavior disorders**

A. Any mental disorder

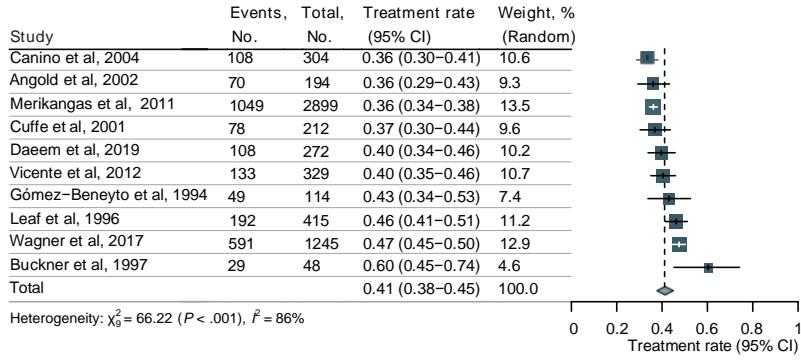

B. Depressive disorders

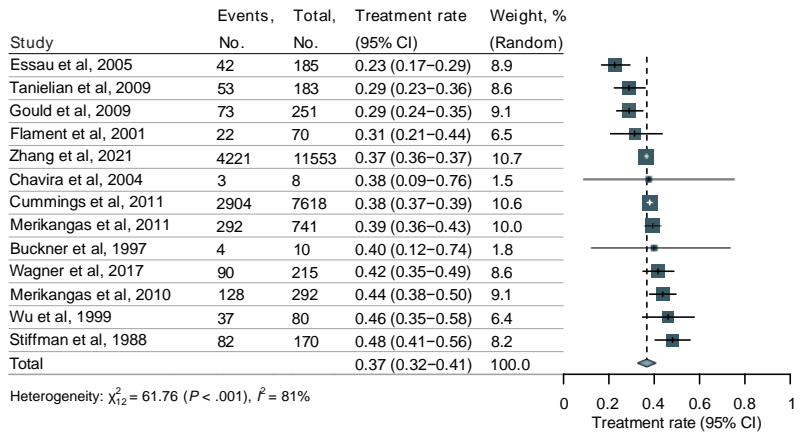

C. Anxiety disorders

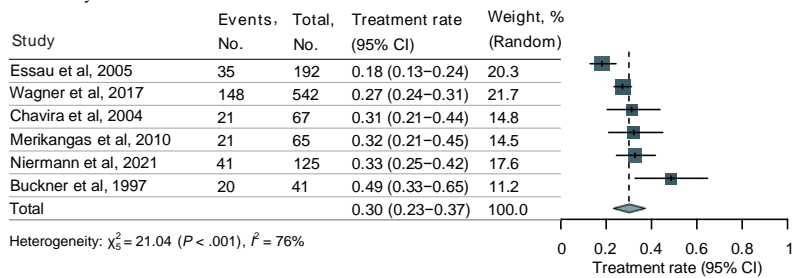

D. Attention deficit hyperactivity disorder (ADHD)

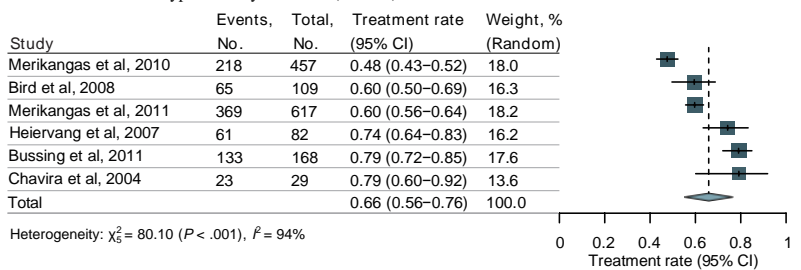

E. Behavior disorders

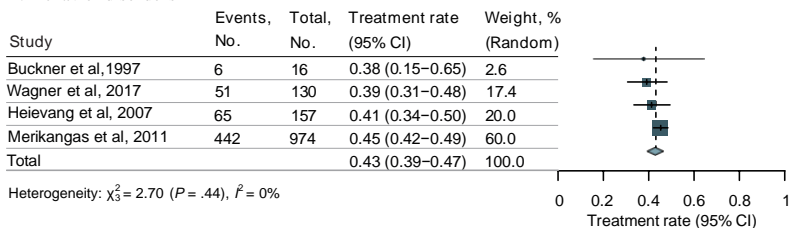

**eFigure 49. Sensitivity analysis by excluding studies in which the 95% CI was outside the aggregated 95% CI of all studies**

A. Any mental disorder

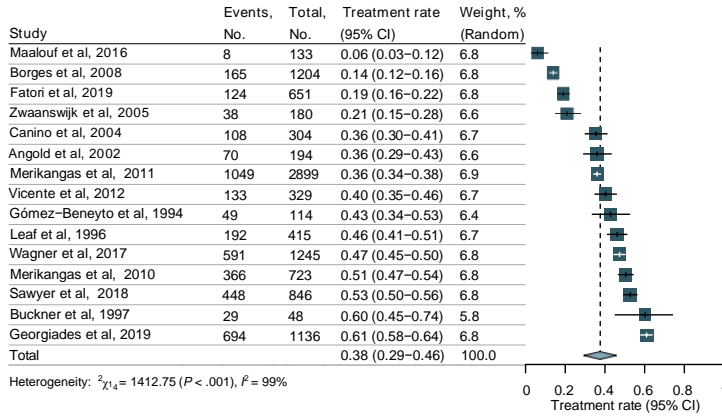

B. Depressive disorders

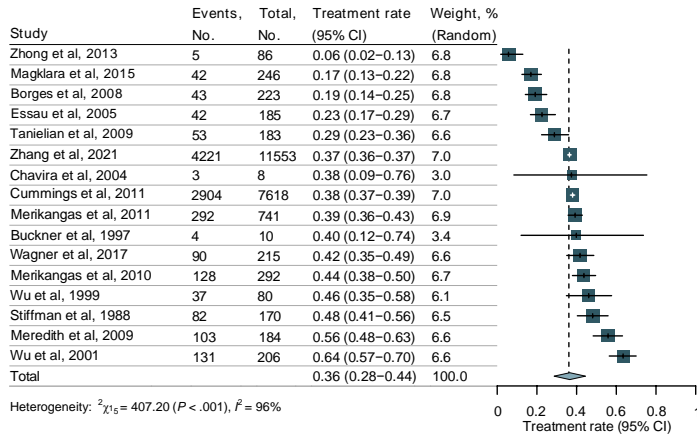

C. Anxiety disorders

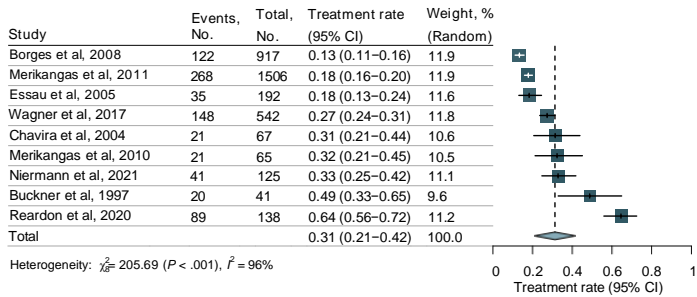

D. Attention deficit hyperactivity disorder(ADHD)

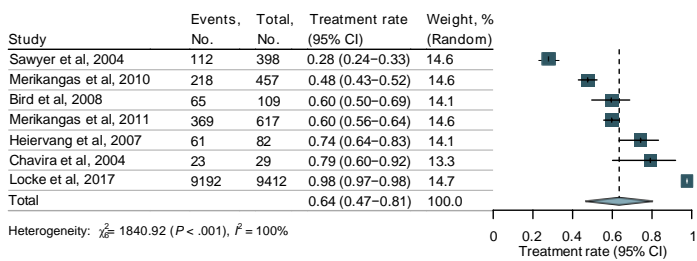

E. Behavior disorders

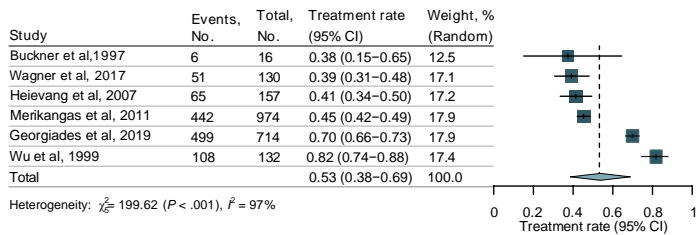

eFigure 50. Sensitivity analysis by excluding studies not reported age ranges

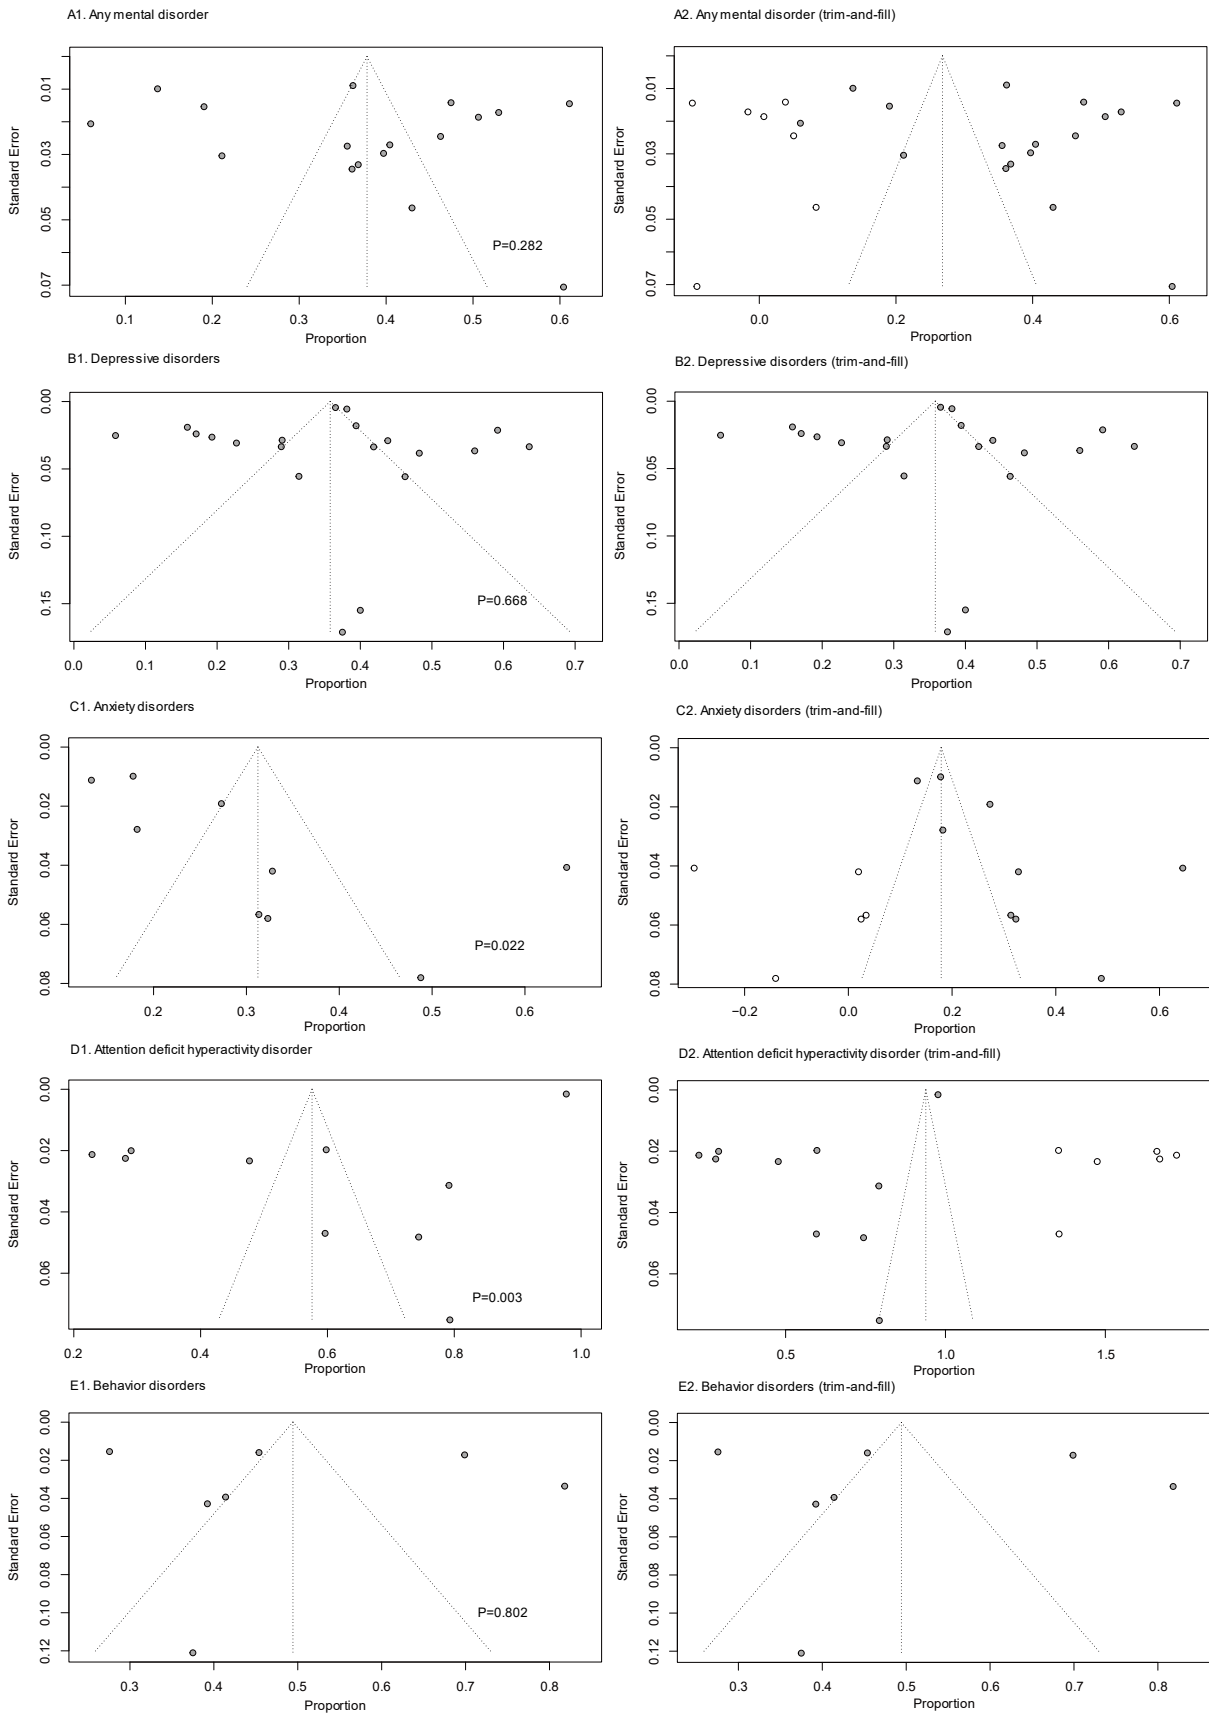

**eFigure 51. Funnel plot (left) and trim-and-fill funnel plot (right)**



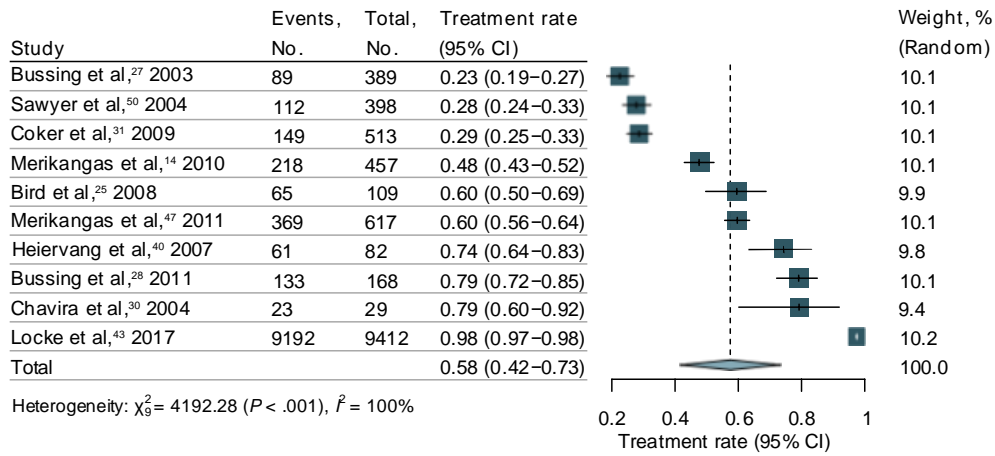

**eFigure 52. Treatment Rates for ADHD**

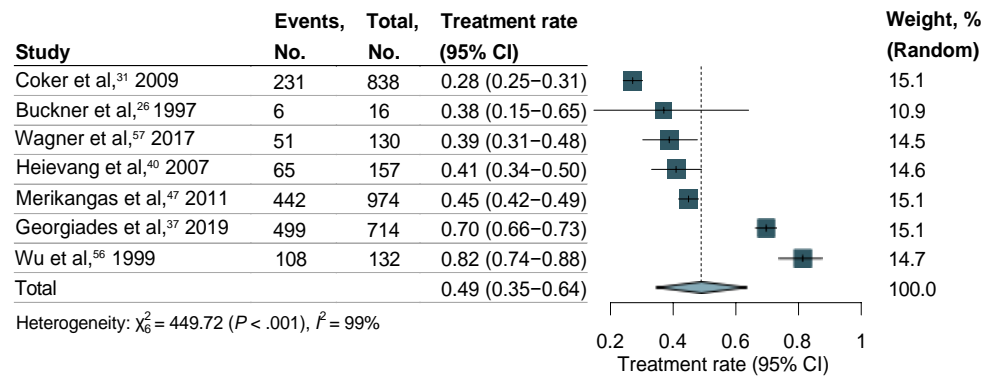

**eFigure 53. Treatment Rates for Behavior Disorders**

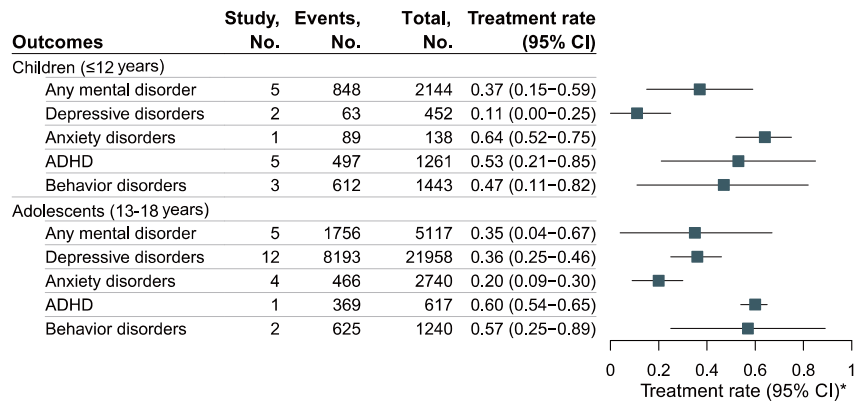

**eFigure 54. Subgroup Analysis by Age Group**

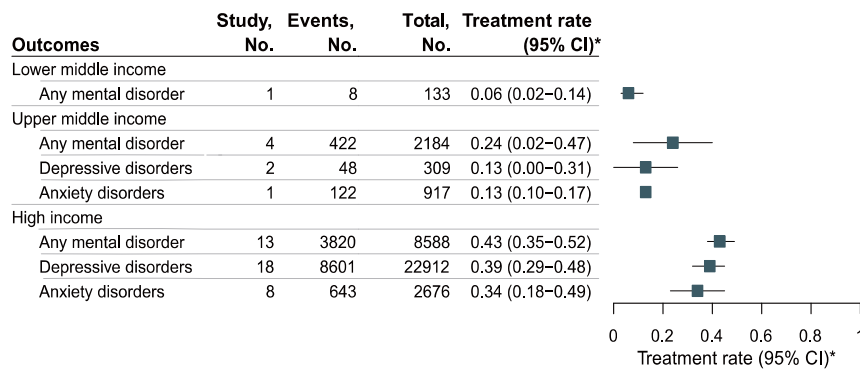

**eFigure 55. Subgroup Analysis by Income Level**

## **eMethods 1. Retrieval Strategy**

According to the topic of this study, the keywords to be searched were “mental disorders”, “depressive disorders”, “anxiety disorders”, “attention deficit hyperactivity disorder”, “behavior disorders”, “treatment rate”, “children”, “adolescent”, and “seeking help”. In order to find as many articles as we need, we looked for terms with the same meaning but different expressions as these keywords in other similar systematic reviews or Medical Subject Headings. The search terms were consistently used in different databases. Literature search was limited to English journals. (Take Pubmed for example, search entry available online: see eAppendix). Each retrieval step was performed by two researchers (SW and QL) independently. If there is a disagreement between the two researchers, a third party (Senior researcher, YX) will participate in discussion and resolve the inconsistencies.

## **eMethods 2. Exposure**

Any mental disorder mainly included anxiety disorders (panic disorder, generalized anxiety disorders, agoraphobia without panic disorder, specific phobia, social phobia, posttraumatic stress disorder, obsessive-compulsive disorder, separation anxiety disorders), mood disorders (major depressive disorders, dysthymic disorder, bipolar disorder I or II), impulse control disorders (oppositional defiant disorder, conduct disorder, attention deficit hyperactivity disorder, intermittent explosive disorder), and substance use disorders (alcohol and drug abuse and dependence). This fact should arouse our attention, the partial literature collected in this study did not include all of the conditions mentioned above.

The diagnostic tools used include the Child and Adolescent Psychiatric Assessment (CAPA),<sup>1</sup> the Diagnostic Interview Schedule for Children (DISC-IV/ DISC 2.3),<sup>2-3</sup> the anxiety disorders Interview Schedule for Children-Parent Version (ADIS-C/P),<sup>4</sup> the World Mental Health Composite International Diagnostic Interview (CIDI; ICD-9/10),<sup>5</sup> the Present Episode Version of the Schedule for Affective Disorders and Schizophrenia for School-Aged Children (K-SADS),<sup>6</sup> the Development and Well-Being Assessment (DAWBA),<sup>7</sup> the Mini International Neuropsychiatric Interview for Children and Adolescents (MINI-KID),<sup>8</sup> and the Diagnostic Interview for Children and Adolescents (DICA).<sup>9</sup>

## **eResults. Study Selection**

A total of 39251 articles were initially included. When duplicates were removed, 26350 studies were left. Two authors conducted preliminary screening according to the title and abstract of the article respectively. 338 articles were screened for full-text reading, 68 literatures were obtained. By searching the references of the 68 literatures, a total of 9 records meeting the criteria were found. If multiple studies used overlapping samples but provided unique treatment rates for diseases, all studies were retained for analysis. If multiple studies with overlapping samples assess treatment rates for the same disease, determining which study to include in the meta-analysis is based on the largest sample size and the most detailed description. After excluding 34 studies with duplicate samples and three studies with a quality score of less than 5, 40 studies were eventually included analysis.

## **eAppendix. Explicit Search Entry**

*Search term for the systematic literature in Pubmed:*

#1 (((((((((((((((((((("Help-Seeking Behavior"[Title/Abstract]) OR ("Healthcare Disparities"[Title/Abstract])) OR ("Health Services Accessibility"[Title/Abstract])) OR ("Mental Health Services"[Title/Abstract])) OR ("Community Mental Health Services"[Title/Abstract])) OR ("treatment

gap"[Title/Abstract])) OR ("treatment gaps"[Title/Abstract])) OR ("treatment rates") OR ("treatment rate\*") OR ("under treatment"[Title/Abstract])) OR ("treatment need"[Title/Abstract])) OR ("treatment seeking"[Title/Abstract])) OR ("seeking treatment"[Title/Abstract])) OR ("health care seeking"[Title/Abstract])) OR ("seeking care"[Title/Abstract])) OR ("access to care"[Title/Abstract])) OR ("professional help"[Title/Abstract])) OR ("barriers to treatment"[Title/Abstract])) OR ("treatment barrier\*"[Title/Abstract])) OR ("Patient Compliance"[Title/Abstract])) OR ("Patient Acceptance of Health Care"[Title/Abstract])) OR ("Medication Adherence"[Title/Abstract])) OR ("Treatment Adherence and Compliance"[Title/Abstract])) OR ("Treatment Adherence"[Title/Abstract])) OR ("Treatment Compliance"[Title/Abstract]))

AND

#2 (((((((((((((((("Mental Disorder\*"[Title/Abstract]) OR ("Psychiatric Disorder\*"[Title/Abstract])) OR (Depression[Title/Abstract])) OR ("depressive disorders\*"[Title/Abstract])) OR ("depressive disorders, Major"[Title/Abstract])) OR ("major depressive episode"[Title/Abstract])) OR (anxiety[Title/Abstract])) OR ("anxiety disorders"[Title/Abstract])) OR (Hypervigilance[Title/Abstract])) OR ("Generalized anxiety disorders"[Title/Abstract])) OR ("Behavior Disorder\*"[Title/Abstract])) OR ("Emotional Disorder\*"[Title/Abstract])) OR ("conduct disorders"[Title/Abstract])) OR (ODD[Title/Abstract])) OR ("attention deficit hyperactivity disorder\*"[Title/Abstract])) OR ("ADHD" [Title/Abstract])) OR ("Disruptive behavior disorder\*"[Title/Abstract])) OR ("Mental problem"[Title/Abstract]))

AND

#3 (((((((((((adolescent\*[Title/Abstract]) OR (teenager\*[Title/Abstract])) OR (child\*[Title/Abstract])) OR (children[Title/Abstract])) OR (student\*[Title/Abstract])) OR (juvenile\*[Title/Abstract])) OR (school\*[Title/Abstract])) OR (teen\*[Title/Abstract])) OR (young[Title/Abstract])) OR (youth\*[Title/Abstract])) OR (minors[Title/Abstract]))

## References

1. Angold A, Costello EJ. The Child and Adolescent Psychiatric Assessment (CAPA). *J Am Acad Child Adolesc Psychiatry*. 2000;39(1):39-48. doi: 10.1097/00004583-200001000-00015
2. Schwab-Stone ME, Shaffer D, Dulcan MK, et al. Criterion validity of the NIMH Diagnostic Interview Schedule for Children Version 2.3 (DISC-2.3). *J Am Acad Child Adolesc Psychiatry*. 1996;35(7):878-88. doi: 10.1097/00004583-199607000-00013
3. Shaffer D, Fisher P, Lucas CP, Dulcan MK, Schwab-Stone ME. NIMH Diagnostic Interview Schedule for Children Version IV (NIMH DISC-IV): description, differences from previous versions, and reliability of some common diagnoses. *J Am Acad Child Adolesc Psychiatry*. 2000;39(1):28-38. doi: 10.1097/00004583-200001000-00014
4. Wood JJ, Piacentini JC, Bergman RL, McCracken J, Barrios V. Concurrent validity of the anxiety disorders section of the Anxiety Disorders Interview Schedule for DSM-IV: child and parent versions. *J Clin Child Adolesc Psychol*. 2002;31(3):335-42. doi: 10.1207/S15374424JCCP3103\_05
5. Kessler RC, Üstün TB. The World Mental Health (WMH) Survey Initiative Version of the World Health Organization (WHO) Composite International Diagnostic Interview (CIDI). *Int J Methods Psychiatr Res*. 2004;13(2):93-121. doi: 10.1002/mpr.168
6. Chambers WJ, Puig-Antich J, Hirsch M, et al. The assessment of affective disorders in children and adolescents by semistructured interview. Test-retest reliability of the schedule for affective disorders and

schizophrenia for school-age children, present episode version. *Arch Gen Psychiatry*. 1985;42(7):696-702. doi: 10.1001/archpsyc.1985.01790300064008

7. Goodman R, Ford T, Richards H, Gatward R, Meltzer H. The Development and Well-Being Assessment: description and initial validation of an integrated assessment of child and adolescent psychopathology. *J Child Psychol Psychiatry*. 2000;41(5):645-55.

8. Sheehan DV, Sheehan KH, Shytle RD, et al. Reliability and validity of the Mini International Neuropsychiatric Interview for Children and Adolescents (MINI-KID). *J Clin Psychiatry*. 2010;71(3):313-26. doi: 10.4088/JCP.09m05305whi

9. Reich W, Herjanic B, Welner Z, Gandhi PR. Development of a structured psychiatric interview for children: agreement on diagnosis comparing child and parent interviews. *J Abnorm Child Psychol*. 1982;10(3):325-36. doi: 10.1007/BF00912325
