# Supplementary material for: Treatment Rates for Mental Disorders Among Children and Adolescents: A Systematic Review and Meta-Analysis
Source: PubMed Central journal article supplement (PMC10585417; doi:10.1001/jamanetworkopen.2023.38174), 2023-10-18
Supplement: jamanetwopen-e2338174-s002.pdf [file jamanetwopen-e2338174-s002.pdf]

## Data Sharing Statement

Wang. Treatment Rates for Mental Disorders Among Children and Adolescents. *JAMA Netw Open*. Published October 18, 2023. doi:10.1001/jamanetworkopen.2023.38174

### Data

**Data available:** Yes

**Data types:** Data (not involving human participants)

**How to access data:** Will be available from the corresponding author under request.

**When available:** With publication

### Supporting Documents

**Document types:** None

### Additional Information

**Who can access the data:** researchers whose proposed use of the data has been approved

**Types of analyses:** for any purpose

**Mechanisms of data availability:** after approval of a proposal
